# Supplementary material for: Leveraging family history data to disentangle time-varying effects on disease risk using lifecourse mendelian randomization
Source: Eur J Epidemiol. 2023 May 8;38(7):765–9. doi: 10.1007/s10654-023-01001-8 (PMC10276123; doi:10.1007/s10654-023-01001-8)
Supplement: Supplementary file 1 — Supplementary Material 1 [file 10654_2023_1001_MOESM1_ESM.xlsx]

## Sheet: S1 Characteristics
Supplementary Table 1: Reported parental history of disease by UK Biobank participants
Sample sizes for 8 major outcomes proxied based on reported family history in the UK Biobank study
Outcome	Neither parent	One parent	Both parents
Bowel cancer	370790	40729	1440
Breast cancer	388356	35102	NA
Diabetes	346762	66806	4926
Heart disease	237069	147976	33449
High blood pressure	238313	142223	37958
Lung cancer	363382	47265	2312
Prostate cancer	368725	30945	NA
Stroke	307691	100086	10717

## Sheet: S2 Instruments
Supplementary Table 2: Genetic instruments for childhood and adult body size
Exposure - Childhood/adult body size, SNP - single nucleotide polymorphism, CHR - chromosome, BP - base position, ALLELE1 - effect allele, ALLELE0 - other allele, A1FREQ - effect allele frequency, BETA - effect estimate, SE - standard error, P - p-value
Exposure	SNP	CHR	BP	ALLELE1	ALLELE0	A1FREQ	BETA	SE	P
Childhood body size	rs2229330	1	6649228	T	G	0.92759	-0.0197644	0.00269415	2.2e-13
Childhood body size	rs6685497	1	7031225	T	A	0.579609	0.00814036	0.00141973	9.8e-09
Childhood body size	rs6577497	1	8605667	A	T	0.614272	0.00806032	0.00143418	1.9e-08
Childhood body size	rs772512446	1	15835218	TTTC	T	0.688891	0.00996926	0.00151048	4.1e-11
Childhood body size	rs212517	1	21577159	T	A	0.398321	0.00877032	0.00143113	8.9e-10
Childhood body size	rs2356864	1	50839740	G	A	0.479203	-0.00859803	0.00139942	8e-10
Childhood body size	rs630602	1	54728864	G	C	0.393414	-0.0101746	0.00143972	1.6e-12
Childhood body size	rs12140153	1	62579891	G	T	0.905761	0.0218143	0.00245448	6.2e-19
Childhood body size	rs2767486	1	65991203	A	G	0.797514	-0.0153791	0.00174285	1.1e-18
Childhood body size	rs2755253	1	67470843	C	T	0.291714	0.00870349	0.0015392	1.6e-08
Childhood body size	rs11209943	1	72750500	A	G	0.396432	-0.0183324	0.00142764	9.7e-38
Childhood body size	rs12042908	1	74997762	A	G	0.437703	0.0274639	0.00141114	2.3e-84
Childhood body size	rs34517439	1	78450517	C	A	0.87821	-0.0137423	0.00216441	2.2e-10
Childhood body size	rs11165687	1	97099767	C	T	0.590832	-0.00815867	0.00142095	9.4e-09
Childhood body size	rs7550711	1	110082886	C	T	0.973981	-0.0484762	0.00441208	4.4e-28
Childhood body size	rs3013431	1	113242488	C	T	0.388477	0.00868953	0.00143461	1.4e-09
Childhood body size	rs12132598	1	115235785	A	G	0.667322	-0.00833677	0.0014868	2.1e-08
Childhood body size	rs7536458	1	118864602	T	G	0.737635	-0.0101349	0.0015886	1.8e-10
Childhood body size	rs11205303	1	149906413	T	C	0.593282	0.00959504	0.00142525	1.7e-11
Childhood body size	rs35588936	1	155950963	C	T	0.935497	0.0180623	0.00286715	3e-10
Childhood body size	rs543874	1	177889480	A	G	0.794752	-0.0470912	0.00173201	8.8e-163
Childhood body size	rs78444298	1	184672098	G	A	0.980505	0.0420029	0.00509728	1.7e-16
Childhood body size	rs4074404	1	187683956	T	A	0.840611	-0.0126796	0.00192281	4.3e-11
Childhood body size	rs16839832	1	196349909	G	T	0.917759	-0.0141143	0.00255396	3.3e-08
Childhood body size	rs9438393	1	205782718	A	G	0.585662	0.0103602	0.00142153	3.1e-13
Childhood body size	rs7354849	1	232765308	A	G	0.540843	-0.00815381	0.0014102	7.4e-09
Childhood body size	rs34769667	2	389257	T	C	0.956871	-0.0311127	0.00512128	1.2e-09
Childhood body size	rs62106258	2	417167	T	C	0.951459	0.080258	0.00325353	2.4e-134
Childhood body size	rs7564167	2	645190	A	G	0.0627988	-0.0445013	0.00292965	4.1e-52
Childhood body size	rs9678953	2	694759	G	A	0.736203	0.0144992	0.00158645	6.3e-20
Childhood body size	rs2141004	2	6194359	A	C	0.735808	0.010043	0.00158813	2.6e-10
Childhood body size	rs139197338	2	24864916	C	T	0.949582	-0.0284306	0.00367208	9.8e-15
Childhood body size	rs10182458	2	25150641	A	G	0.513877	-0.035916	0.00139959	3.1e-145
Childhood body size	rs6719507	2	29733801	G	A	0.558383	0.00782016	0.00140955	2.9e-08
Childhood body size	rs62134189	2	45046339	A	G	0.896658	0.0141902	0.00232451	1e-09
Childhood body size	rs2902142	2	58849805	C	T	0.625064	0.00869839	0.00144586	1.8e-09
Childhood body size	rs2539692	2	59841988	T	A	0.391021	0.00807502	0.00143304	1.8e-08
Childhood body size	rs1177279	2	61295122	A	G	0.2779	0.00887429	0.00156422	1.4e-08
Childhood body size	rs7565437	2	65646966	T	C	0.590225	0.00818239	0.00142577	9.5e-09
Childhood body size	rs112898427	2	67561335	C	T	0.299591	0.0103291	0.00154959	2.6e-11
Childhood body size	rs12713889	2	77225361	T	C	0.670052	0.0116923	0.00148689	3.7e-15
Childhood body size	rs772175	2	96944553	G	A	0.664934	0.00807618	0.00148115	5e-08
Childhood body size	rs1384660	2	142299735	G	A	0.814942	0.0157939	0.00180243	1.9e-18
Childhood body size	rs62175963	2	161339964	T	C	0.576706	0.00897371	0.00141452	2.2e-10
Childhood body size	rs5836745	2	181598923	C	CA	0.492142	-0.0076768	0.00140795	5e-08
Childhood body size	rs7606059	2	188152749	T	C	0.335053	-0.0104987	0.00149573	2.2e-12
Childhood body size	rs115319174	2	207066474	G	C	0.942407	-0.0423001	0.00303582	4e-44
Childhood body size	rs636402	2	219466859	T	C	0.395066	0.00830694	0.00143104	6.4e-09
Childhood body size	rs3791478	2	240064139	T	C	0.890549	0.0124909	0.00226463	3.5e-08
Childhood body size	rs1476698	2	242296449	A	G	0.631534	0.0082093	0.00144953	1.5e-08
Childhood body size	rs2594994	3	11339960	T	A	0.178094	0.0154935	0.00183004	2.5e-17
Childhood body size	rs6775191	3	12272199	G	A	0.678341	-0.00831876	0.0015008	3e-08
Childhood body size	rs7619139	3	25110415	T	A	0.411293	-0.00980824	0.00142669	6.2e-12
Childhood body size	rs1402989	3	27056851	C	T	0.514974	-0.00780358	0.00140196	2.6e-08
Childhood body size	rs2268762	3	38516075	A	G	0.388067	-0.00799938	0.001436	2.5e-08
Childhood body size	rs754635	3	42305131	C	G	0.113398	-0.0159112	0.00220628	5.5e-13
Childhood body size	rs2034963	3	48170802	G	C	0.35132	0.0110936	0.00147955	6.5e-14
Childhood body size	rs35926495	3	50255663	C	T	0.623257	-0.00905486	0.00145438	4.8e-10
Childhood body size	rs3774604	3	53824136	C	T	0.631085	0.00794743	0.00145434	4.6e-08
Childhood body size	rs2629881	3	59778271	C	T	0.22119	-0.0106221	0.00169235	3.5e-10
Childhood body size	rs4688359	3	61198880	C	T	0.626072	0.0130228	0.00144862	2.5e-19
Childhood body size	rs538579	3	62711674	G	C	0.685061	-0.00841291	0.00150928	2.5e-08
Childhood body size	rs115903965	3	66009529	G	A	0.975613	-0.0256573	0.00454383	1.6e-08
Childhood body size	rs4677156	3	72417857	A	T	0.230804	0.00924136	0.0016795	3.7e-08
Childhood body size	rs71630124	3	77648392	A	AATAG	0.419639	0.00855124	0.00144243	3.1e-09
Childhood body size	rs1357798	3	83780583	C	T	0.213947	-0.00937945	0.00171135	4.2e-08
Childhood body size	rs11437467	3	84791946	A	AT	0.708611	-0.0096074	0.00154368	4.9e-10
Childhood body size	rs7355953	3	85792137	T	C	0.784962	-0.0151808	0.00170925	6.6e-19
Childhood body size	rs2735556	3	88105360	T	C	0.885665	0.0172019	0.00219664	4.8e-15
Childhood body size	rs112660801	3	131493868	C	T	0.924294	0.0159516	0.00267881	2.6e-09
Childhood body size	rs7625768	3	131774642	G	A	0.682031	-0.0101882	0.00150607	1.3e-11
Childhood body size	rs5852911	3	138112533	T	TTTC	0.190567	0.0134755	0.00178684	4.6e-14
Childhood body size	rs59714050	3	141267294	T	A	0.933673	-0.0228199	0.00281485	5.2e-16
Childhood body size	rs355748	3	153964496	G	T	0.62244	-0.00992628	0.00144886	7.3e-12
Childhood body size	rs7633995	3	180369750	A	G	0.899338	-0.0144979	0.00247584	4.7e-09
Childhood body size	rs10937241	3	185822774	A	G	0.160567	-0.0109168	0.0019097	1.1e-08
Childhood body size	rs34811474	4	25408838	G	A	0.76914	0.0101915	0.00166266	8.8e-10
Childhood body size	rs7656673	4	30840331	A	G	0.599358	-0.0115396	0.00142921	6.8e-16
Childhood body size	rs71641382	4	38679499	A	AGT	0.683216	0.00977342	0.0016361	2.3e-09
Childhood body size	rs767171141	4	45177546	AC	A	0.567072	-0.0223479	0.00141901	7e-56
Childhood body size	rs788859	4	82138211	G	A	0.675033	0.0122379	0.00150878	5e-16
Childhood body size	rs7377083	4	102708997	C	A	0.568979	-0.013716	0.00142534	6.4e-22
Childhood body size	rs72675820	4	130746149	A	C	0.357101	0.009938	0.00146064	1e-11
Childhood body size	rs146925117	4	137165053	T	TGG	0.627222	0.00903604	0.00145322	5e-10
Childhood body size	rs11727676	4	145659064	T	C	0.903565	0.0131142	0.0023713	3.2e-08
Childhood body size	rs547065676	5	55857548	A	AT	0.809248	0.010965	0.001794	9.8e-10
Childhood body size	rs548695220	5	60729302	G	GT	0.654756	0.01147	0.00148753	1.3e-14
Childhood body size	rs16893327	5	60954719	T	C	0.743406	-0.00915607	0.00161463	1.4e-08
Childhood body size	rs9291816	5	63932508	C	T	0.676351	0.0134228	0.00149771	3.2e-19
Childhood body size	rs539787360	5	66162744	TTTTG	T	0.364134	-0.00850187	0.0014648	6.5e-09
Childhood body size	rs39862	5	66185151	T	C	0.717446	0.0116463	0.00155705	7.4e-14
Childhood body size	rs11386247	5	72999847	T	TA	0.297532	0.00904504	0.00158982	1.3e-08
Childhood body size	rs2307111	5	75003678	T	C	0.604907	0.00873564	0.00143338	1.1e-09
Childhood body size	rs1422067	5	77424836	C	T	0.762745	0.0108312	0.00164516	4.6e-11
Childhood body size	rs2115885	5	87598818	G	A	0.791515	0.0105899	0.00173398	1e-09
Childhood body size	rs77960	5	103964585	G	A	0.671971	0.0104759	0.00149259	2.2e-12
Childhood body size	rs111726171	5	152015097	T	TA	0.725723	0.0101374	0.00158469	1.6e-10
Childhood body size	rs7719067	5	153538241	A	G	0.427582	0.0134965	0.00141391	1.4e-21
Childhood body size	rs369929101	5	158433655	TAAAAAAAAAAAAAAAAAAA	T	0.360326	-0.00888859	0.00148594	2.2e-09
Childhood body size	rs918472	5	170738836	G	A	0.283869	-0.00986276	0.00155977	2.6e-10
Childhood body size	rs767647218	6	10015295	TTA	T	0.649475	0.010818	0.00148748	3.5e-13
Childhood body size	rs560987445	6	22732173	T	TAATAAACCACTTCAACTTCTGAAGTTCCAG	0.851075	-0.0118168	0.0019709	2e-09
Childhood body size	rs35162296	6	26318262	C	T	0.894147	-0.020031	0.00227175	1.2e-18
Childhood body size	rs34196306	6	27425644	G	C	0.893449	-0.019962	0.00228684	2.6e-18
Childhood body size	rs147662640	6	28866368	A	AT	0.85963	-0.0185729	0.0020422	9.5e-20
Childhood body size	rs9260164	6	29911684	C	T	0.737668	-0.0151448	0.00161422	6.5e-21
Childhood body size	rs9265968	6	31315663	A	T	0.866272	-0.0201199	0.00210963	1.5e-21
Childhood body size	rs3129942	6	32338283	G	T	0.742436	-0.0139298	0.00159838	2.9e-18
Childhood body size	rs6940215	6	34706358	G	A	0.701684	-0.00919131	0.00153324	2e-09
Childhood body size	rs686431	6	35974217	C	T	0.981257	-0.030147	0.00519975	6.7e-09
Childhood body size	rs59644697	6	41721682	G	GT	0.625237	-0.0104865	0.00146387	7.9e-13
Childhood body size	rs76187039	6	43233990	G	T	0.865193	-0.0113143	0.00205082	3.4e-08
Childhood body size	rs3798519	6	50788778	A	C	0.820086	-0.0249912	0.00182368	9.7e-43
Childhood body size	rs1775255	6	51243035	G	T	0.523411	-0.0133343	0.00140502	2.3e-21
Childhood body size	rs1342831	6	54096151	T	C	0.942918	-0.0224973	0.00301586	8.7e-14
Childhood body size	rs12110721	6	55190480	G	A	0.825618	-0.0189304	0.00189373	1.6e-23
Childhood body size	rs34728216	6	56210163	C	CAT	0.762383	-0.00993814	0.00165459	1.9e-09
Childhood body size	rs435775	6	97237609	A	G	0.252094	-0.0100337	0.00161534	5.2e-10
Childhood body size	rs6931604	6	98578215	C	T	0.398855	-0.00832718	0.00143263	6.2e-09
Childhood body size	rs36136320	6	100141738	G	A	0.802532	-0.0102487	0.00175751	5.5e-09
Childhood body size	rs34260097	6	100727703	T	G	0.776056	-0.0178199	0.00167851	2.5e-26
Childhood body size	rs529793121	6	101215651	A	AT	0.563207	-0.00893358	0.00146764	1.2e-09
Childhood body size	rs7759938	6	105378954	C	T	0.321912	-0.00994913	0.00149939	3.2e-11
Childhood body size	rs7753558	6	117523471	C	A	0.36595	0.00909179	0.00146249	5.1e-10
Childhood body size	rs1452991	6	141473363	G	A	0.627782	-0.0100544	0.00145809	5.4e-12
Childhood body size	rs796915	6	154304628	C	G	0.305175	-0.0128931	0.00152331	2.6e-17
Childhood body size	rs62425398	6	166416028	C	A	0.893663	-0.0153325	0.00228405	1.9e-11
Childhood body size	rs115359679	7	755987	C	A	0.930782	-0.0163924	0.00285925	9.9e-09
Childhood body size	rs2349179	7	8404389	T	A	0.615818	-0.00790048	0.00144944	5e-08
Childhood body size	rs5882386	7	13112814	CA	C	0.796856	0.00975786	0.00179001	5e-08
Childhood body size	rs2722406	7	24306762	C	T	0.715873	-0.0121843	0.00155476	4.6e-15
Childhood body size	rs4723263	7	33194826	G	C	0.566915	-0.00834008	0.00141268	3.6e-09
Childhood body size	rs10234366	7	46743746	G	A	0.895237	-0.0139555	0.00229179	1.1e-09
Childhood body size	rs71231793	7	76682610	T	C	0.841645	-0.0153981	0.00204201	4.7e-14
Childhood body size	rs1852006	7	77829768	G	A	0.64299	0.00879596	0.00146116	1.7e-09
Childhood body size	rs75001243	7	93216002	C	T	0.640117	-0.0137392	0.00145963	4.8e-21
Childhood body size	rs6974282	7	100098295	C	T	0.804155	0.0100575	0.00177797	1.5e-08
Childhood body size	rs7808296	7	103127620	C	T	0.684557	-0.0100387	0.00150798	2.8e-11
Childhood body size	rs262338	7	103417134	G	T	0.547323	-0.0088107	0.00141551	4.8e-10
Childhood body size	rs10953577	7	108263540	T	C	0.623364	-0.00855375	0.00144694	3.4e-09
Childhood body size	rs67679818	7	110672704	C	T	0.417621	0.00780733	0.00142954	4.7e-08
Childhood body size	rs6979832	7	127856276	A	G	0.503006	-0.00938812	0.00140943	2.7e-11
Childhood body size	rs11525873	7	138817193	T	C	0.902215	0.0174305	0.00236292	1.6e-13
Childhood body size	rs879274	8	4129120	G	T	0.734957	-0.00967429	0.00160581	1.7e-09
Childhood body size	rs77976727	8	4300554	C	T	0.906093	-0.0151579	0.00240898	3.1e-10
Childhood body size	rs7814267	8	5545084	A	G	0.81462	-0.0109102	0.00182648	2.3e-09
Childhood body size	rs11777719	8	8581038	A	G	0.715936	-0.011653	0.00156172	8.5e-14
Childhood body size	rs13256357	8	9979535	C	T	0.798517	-0.0136536	0.00175085	6.3e-15
Childhood body size	rs2409743	8	11070360	C	G	0.503174	0.0110663	0.00140249	3e-15
Childhood body size	rs10503555	8	15763818	A	G	0.5568	0.00777501	0.00141482	3.9e-08
Childhood body size	rs884152	8	25770557	G	T	0.355895	-0.00851275	0.00146314	6e-09
Childhood body size	rs7012648	8	28091482	G	A	0.414981	-0.00973898	0.00142575	8.4e-12
Childhood body size	rs4739558	8	38337264	A	G	0.399483	0.00830038	0.00143062	6.6e-09
Childhood body size	rs10095724	8	53739232	G	A	0.637545	0.00938105	0.0014609	1.4e-10
Childhood body size	rs10111937	8	54160092	C	T	0.699952	-0.00837524	0.00152821	4.2e-08
Childhood body size	rs35953086	8	57161551	C	CT	0.629396	0.0081594	0.00145262	1.9e-08
Childhood body size	rs13254613	8	64804804	A	C	0.654054	-0.0125636	0.00147493	1.6e-17
Childhood body size	rs35422050	8	76862206	A	AC	0.586421	0.0166821	0.00142419	1.1e-31
Childhood body size	rs7817581	8	143136114	G	A	0.67229	0.008644	0.00149128	6.8e-09
Childhood body size	rs818898	9	6970806	A	G	0.31586	0.0120555	0.00152234	2.4e-15
Childhood body size	rs10962279	9	16103030	T	C	0.781672	-0.0102014	0.00169445	1.7e-09
Childhood body size	rs201666051	9	20920868	C	T	0.618198	-0.00824202	0.00144933	1.3e-08
Childhood body size	rs3118252	9	25115154	G	C	0.416563	-0.00830965	0.00142919	6.1e-09
Childhood body size	rs1935354	9	27822531	T	C	0.51711	-0.0101328	0.00140539	5.6e-13
Childhood body size	rs2378662	9	86707289	G	A	0.45641	-0.00774768	0.00141226	4.1e-08
Childhood body size	rs1619120	9	87302196	A	G	0.399349	-0.00806725	0.00143189	1.8e-08
Childhood body size	rs4744246	9	96254464	A	G	0.656346	-0.0157518	0.00147886	1.7e-26
Childhood body size	rs7020564	9	109670016	A	T	0.702174	0.00997181	0.00155313	1.4e-10
Childhood body size	rs957512	9	120405705	T	C	0.669786	0.0103274	0.0014938	4.7e-12
Childhood body size	rs10116891	9	122651993	G	A	0.89905	-0.0136092	0.00233533	5.6e-09
Childhood body size	rs371453108	9	124348123	A	AT	0.712179	-0.00929946	0.0016151	8.5e-09
Childhood body size	rs2275241	9	129370576	G	A	0.628088	-0.0104243	0.00144901	6.3e-13
Childhood body size	rs10987401	9	129430771	C	T	0.677196	-0.00875623	0.00150924	6.6e-09
Childhood body size	rs117911387	9	130446836	G	A	0.953645	-0.0245837	0.0033306	1.6e-13
Childhood body size	rs7921891	10	2083682	A	G	0.490646	0.00973337	0.00141235	5.5e-12
Childhood body size	rs7084503	10	2666859	T	C	0.491843	0.0128811	0.0014078	5.7e-20
Childhood body size	rs11256627	10	10535954	G	A	0.295322	-0.00888158	0.00154644	9.3e-09
Childhood body size	rs4572029	10	70889053	A	G	0.794818	0.0111276	0.00174963	2e-10
Childhood body size	rs10823504	10	72034062	G	A	0.936321	0.0158076	0.00287275	3.7e-08
Childhood body size	rs2242258	10	75607168	T	C	0.741068	-0.0091916	0.00159774	8.8e-09
Childhood body size	rs17399739	10	87490850	A	G	0.931102	-0.0209712	0.0027706	3.8e-14
Childhood body size	rs10887571	10	88030441	C	T	0.552146	-0.0079879	0.00141944	1.8e-08
Childhood body size	rs41310284	10	102447647	C	A	0.898985	0.0205882	0.00234105	1.4e-18
Childhood body size	rs75387636	10	120278394	G	A	0.958457	-0.0212245	0.00350972	1.5e-09
Childhood body size	rs2939931	10	121636406	T	C	0.517188	-0.00788378	0.00140336	1.9e-08
Childhood body size	rs1061072	10	126684796	G	A	0.892937	0.0126892	0.00227288	2.4e-08
Childhood body size	rs56133711	11	27723334	G	A	0.7406	-0.016226	0.00159844	3.3e-24
Childhood body size	rs7396827	11	28577867	T	C	0.463959	0.010486	0.00141295	1.2e-13
Childhood body size	rs661878	11	29188691	A	G	0.866936	0.0137266	0.00206137	2.8e-11
Childhood body size	rs3181269	11	33755956	C	T	0.745591	0.00937821	0.00160653	5.3e-09
Childhood body size	rs572544808	11	46372405	C	CT	0.811548	-0.0118565	0.00184026	1.2e-10
Childhood body size	rs3972616	11	47461263	A	AT	0.506044	-0.0153074	0.00142791	8.2e-27
Childhood body size	rs553274033	11	48599745	C	CT	0.48266	-0.00845565	0.00147227	9.3e-09
Childhood body size	rs2958542	11	62181882	C	T	0.632298	0.00824671	0.00146398	1.8e-08
Childhood body size	rs2303384	11	65640204	C	T	0.359636	0.0126783	0.00145724	3.3e-18
Childhood body size	rs10791902	11	67093360	C	T	0.58767	-0.00791789	0.00143674	3.6e-08
Childhood body size	rs10896348	11	68357368	T	C	0.723747	0.0118588	0.00156399	3.4e-14
Childhood body size	rs10796828	11	69490346	T	G	0.365603	-0.0113349	0.00145631	7.1e-15
Childhood body size	rs11215403	11	115058585	G	A	0.757269	0.0132511	0.00163429	5.1e-16
Childhood body size	rs7123283	11	122809055	C	T	0.525219	0.00831904	0.0014111	3.7e-09
Childhood body size	rs10790809	11	126372550	A	G	0.44025	-0.00966457	0.00141001	7.2e-12
Childhood body size	rs556882272	11	131464458	T	TA	0.502253	-0.00821684	0.00144918	1.4e-08
Childhood body size	rs3782860	12	361996	C	T	0.454267	-0.00879158	0.00140837	4.3e-10
Childhood body size	rs55726687	12	991306	G	A	0.79024	-0.0145374	0.00171837	2.7e-17
Childhood body size	rs2187642	12	11855624	A	C	0.37581	-0.011155	0.00144452	1.1e-14
Childhood body size	rs77062931	12	19988387	AT	A	0.314384	-0.00851631	0.00152161	2.2e-08
Childhood body size	rs368370337	12	24628938	A	AT	0.518345	0.00843066	0.00142844	3.6e-09
Childhood body size	rs61937656	12	39483502	G	A	0.773702	0.0117312	0.00167808	2.7e-12
Childhood body size	rs116293915	12	42705738	C	A	0.555071	-0.00799321	0.00141319	1.5e-08
Childhood body size	rs201413548	12	49600730	G	GA	0.746626	-0.0115537	0.00163544	1.6e-12
Childhood body size	rs7132908	12	50263148	G	A	0.615537	-0.0312612	0.00144002	1.7e-104
Childhood body size	rs28849840	12	50703384	G	A	0.649819	0.0088813	0.00147161	1.6e-09
Childhood body size	rs78607331	12	57648644	C	T	0.955251	-0.0238858	0.00338447	1.7e-12
Childhood body size	rs7306710	12	66376091	T	C	0.47969	0.00996155	0.00141048	1.6e-12
Childhood body size	rs1696058	12	90767159	T	C	0.402699	0.0083571	0.00145745	9.8e-09
Childhood body size	rs10860295	12	98542699	T	C	0.55235	-0.00848341	0.00141026	1.8e-09
Childhood body size	rs60550417	12	99644477	A	AGATAATTCATT	0.76649	-0.0107368	0.00170057	2.7e-10
Childhood body size	rs12817542	12	103736499	C	T	0.939168	-0.0176477	0.00292724	1.7e-09
Childhood body size	rs61936936	12	116391685	A	T	0.900038	-0.0135294	0.00234389	7.8e-09
Childhood body size	rs7305424	12	118399491	A	T	0.657832	-0.0104024	0.00148311	2.3e-12
Childhood body size	rs12308065	12	120624085	A	G	0.373043	-0.00830314	0.00145475	1.1e-08
Childhood body size	rs28629903	12	122497001	T	C	0.435592	0.00907014	0.00141557	1.5e-10
Childhood body size	rs4771106	13	27929146	T	C	0.24532	-0.0124432	0.00163264	2.5e-14
Childhood body size	rs1933437	13	28624294	G	A	0.374865	0.0141194	0.00144563	1.6e-22
Childhood body size	rs9603697	13	40783323	C	T	0.673168	-0.0129432	0.00149578	5e-18
Childhood body size	rs9594686	13	42723197	C	T	0.823184	0.0106994	0.00184273	6.4e-09
Childhood body size	rs12429545	13	54102206	G	A	0.870646	-0.0206274	0.00210597	1.2e-22
Childhood body size	rs749127773	13	59204780	CTT	C	0.50277	-0.0116238	0.0014038	1.2e-16
Childhood body size	rs5804250	13	66204127	C	CT	0.424661	0.0120527	0.00142596	2.9e-17
Childhood body size	rs1576655	13	79587841	A	C	0.404079	-0.0118531	0.00145786	4.3e-16
Childhood body size	rs61978655	14	30491807	G	A	0.961364	-0.033958	0.00364734	1.3e-20
Childhood body size	rs7161424	14	33309274	G	A	0.520764	-0.0102644	0.00141767	4.5e-13
Childhood body size	rs1865719	14	79923667	A	G	0.367072	-0.0109002	0.00146053	8.4e-14
Childhood body size	rs10133279	14	82702712	C	T	0.558438	-0.00894625	0.00142037	3e-10
Childhood body size	rs7145052	14	92461192	C	T	0.549319	-0.00831198	0.00140939	3.7e-09
Childhood body size	rs7159126	14	93783176	T	C	0.716531	0.00866751	0.0015544	2.5e-08
Childhood body size	rs78420139	14	101201687	G	A	0.944649	0.0170314	0.00309085	3.6e-08
Childhood body size	rs12436513	14	103269755	C	A	0.356981	0.00858419	0.00146045	4.2e-09
Childhood body size	rs824207	15	24007729	A	G	0.465213	-0.00928998	0.00140394	3.7e-11
Childhood body size	rs62048187	15	38117049	G	C	0.682898	-0.00841416	0.00153206	4e-08
Childhood body size	rs377105227	15	47844989	T	TTA	0.330487	-0.00868697	0.00151323	9.4e-09
Childhood body size	rs11374166	15	68078177	C	CT	0.772968	0.0213567	0.00166981	1.9e-37
Childhood body size	rs768397327	15	84575367	CCACACACCA	C	0.484603	0.00931375	0.00140356	3.2e-11
Childhood body size	rs4932200	15	89349708	A	G	0.517228	0.00829324	0.00140774	3.8e-09
Childhood body size	rs3817428	15	89415247	C	G	0.735103	-0.0107532	0.00158826	1.3e-11
Childhood body size	rs12592645	15	89982879	C	A	0.818768	-0.0103323	0.00182081	1.4e-08
Childhood body size	rs2970356	15	90623540	C	G	0.679324	-0.0104353	0.00158448	4.5e-11
Childhood body size	rs72755233	15	100692953	G	A	0.888558	-0.0176469	0.00222453	2.1e-15
Childhood body size	rs1799892	16	3707409	G	C	0.679631	-0.00857689	0.00150255	1.1e-08
Childhood body size	rs2238435	16	4014282	C	G	0.386247	-0.0164841	0.00144201	2.9e-30
Childhood body size	rs55880046	16	19941557	T	G	0.857664	0.0298592	0.00200506	3.7e-50
Childhood body size	rs4238584	16	20252720	T	C	0.0771578	-0.0158455	0.00269959	4.4e-09
Childhood body size	rs759399107	16	20379933	GTGC	G	0.394936	0.0103513	0.00143817	6.1e-13
Childhood body size	rs9922288	16	24550930	A	G	0.235517	0.0104987	0.00167245	3.4e-10
Childhood body size	rs8048855	16	24830839	G	T	0.199337	0.0112625	0.00176853	1.9e-10
Childhood body size	rs62037365	16	28868962	C	G	0.601978	-0.013698	0.00143014	9.9e-22
Childhood body size	rs537412489	16	30181295	T	TG	0.641458	0.0112838	0.00152641	1.4e-13
Childhood body size	rs4496161	16	31223876	G	A	0.476897	0.00778764	0.00140459	2.9e-08
Childhood body size	rs62032001	16	49065630	A	C	0.802785	-0.0104052	0.00176934	4.1e-09
Childhood body size	rs34661722	16	51447339	C	CA	0.777829	0.00958367	0.00168468	1.3e-08
Childhood body size	rs1421085	16	53800954	T	C	0.596552	-0.0473859	0.00142731	1.1e-241
Childhood body size	rs5817557	16	65939977	C	CT	0.415479	0.00835099	0.0014615	1.1e-08
Childhood body size	rs117903946	16	67449639	G	A	0.967498	-0.0322423	0.003949	3.2e-16
Childhood body size	rs2863980	16	68301985	A	C	0.374279	0.00857939	0.00144921	3.2e-09
Childhood body size	rs4985555	16	70690166	A	G	0.501462	0.00873383	0.00140141	4.6e-10
Childhood body size	rs11642090	16	81730582	T	C	0.626428	-0.0117252	0.00145879	9.2e-16
Childhood body size	rs5818851	17	2170655	A	AT	0.658557	0.0120499	0.00149013	6.1e-16
Childhood body size	rs148963195	17	7531252	T	TC	0.70567	-0.0093378	0.00154398	1.5e-09
Childhood body size	rs3815156	17	29685150	A	G	0.82365	-0.0103193	0.00184421	2.2e-08
Childhood body size	rs12601380	17	34904985	A	C	0.587339	0.00777281	0.0014188	4.3e-08
Childhood body size	rs146980124	17	44627649	A	C	0.383726	0.0102212	0.00172477	3.1e-09
Childhood body size	rs35839777	17	46631064	C	CA	0.389626	-0.00932488	0.00152501	9.7e-10
Childhood body size	rs17637472	17	47461433	G	A	0.601401	-0.010909	0.00144363	4.1e-14
Childhood body size	rs7217460	17	65393344	G	A	0.770482	0.00931829	0.0016779	2.8e-08
Childhood body size	rs12941038	17	66509143	C	T	0.769815	-0.00955906	0.00166864	1e-08
Childhood body size	rs2246623	17	74084449	C	T	0.553108	0.00894629	0.00141015	2.2e-10
Childhood body size	rs11150745	17	78757626	A	G	0.68227	0.0121632	0.00150724	7e-16
Childhood body size	rs7503580	17	79087036	C	T	0.841844	-0.0111229	0.00193299	8.7e-09
Childhood body size	rs1013737	18	937050	G	C	0.506779	-0.0106427	0.00140313	3.3e-14
Childhood body size	rs5822974	18	7548483	T	TA	0.809913	0.00986291	0.00179757	4.1e-08
Childhood body size	rs1808579	18	21104888	C	T	0.517857	0.00913203	0.00140361	7.7e-11
Childhood body size	rs7237444	18	39468982	G	A	0.327748	0.0100816	0.00152132	3.4e-11
Childhood body size	rs7239114	18	45921214	G	A	0.458349	-0.0134876	0.00141723	1.8e-21
Childhood body size	rs68015088	18	51484010	G	A	0.654098	0.00809776	0.00147872	4.3e-08
Childhood body size	rs35006536	18	52492700	G	GTC	0.76607	-0.0127901	0.00165776	1.2e-14
Childhood body size	rs663129	18	57838401	G	A	0.766595	-0.0332603	0.00165548	8.8e-90
Childhood body size	rs529338954	18	58155169	T	TAA	0.973531	0.0404098	0.00442466	6.7e-20
Childhood body size	rs8096658	18	77156537	C	G	0.512551	0.0089942	0.00141862	2.3e-10
Childhood body size	rs62621197	19	8670147	C	T	0.962835	-0.023491	0.00384761	1e-09
Childhood body size	rs4545941	19	16534207	T	C	0.831369	-0.0108851	0.00190318	1.1e-08
Childhood body size	rs116399833	19	18502374	C	A	0.77367	-0.0123406	0.00170532	4.6e-13
Childhood body size	rs7253952	19	19358332	A	G	0.751824	0.0105752	0.00162766	8.2e-11
Childhood body size	rs3810304	19	30861683	A	G	0.22577	0.0102942	0.00167796	8.5e-10
Childhood body size	rs112590736	19	36711757	CT	C	0.587991	0.00801816	0.00143694	2.4e-08
Childhood body size	rs1800437	19	46181392	G	C	0.80578	0.0117602	0.00176856	2.9e-11
Childhood body size	rs3810291	19	47569003	G	A	0.324953	-0.0147598	0.00149533	5.6e-23
Childhood body size	rs601338	19	49206674	G	A	0.49204	0.00937556	0.00139988	2.1e-11
Childhood body size	rs200876443	19	50363585	CAG	C	0.96462	-0.0241575	0.00378882	1.8e-10
Childhood body size	rs200744777	20	6609610	T	G	0.561375	-0.0121414	0.00142158	1.3e-17
Childhood body size	rs73619849	20	15809756	G	GA	0.872874	-0.0201221	0.00214965	7.9e-21
Childhood body size	rs947088	20	17171373	G	T	0.282112	-0.0106403	0.0015617	9.5e-12
Childhood body size	rs8117463	20	17231063	G	A	0.675262	0.00886383	0.00149881	3.3e-09
Childhood body size	rs73085586	20	22430241	G	A	0.798751	-0.00971214	0.00175212	3e-08
Childhood body size	rs2281148	20	36433288	T	C	0.749285	-0.00978511	0.00161906	1.5e-09
Childhood body size	rs2244669	20	54153869	T	C	0.676366	-0.0089424	0.00149949	2.5e-09
Childhood body size	rs2207894	20	54387343	C	T	0.808677	0.0143441	0.00178112	8e-16
Childhood body size	rs117455294	20	57427951	C	A	0.948721	0.0193066	0.00317254	1.2e-09
Childhood body size	rs8130408	21	39237138	A	C	0.255786	-0.00901674	0.00161356	2.3e-08
Childhood body size	rs13047416	21	40309436	C	G	0.622962	0.0123762	0.00145063	1.4e-17
Childhood body size	rs78907487	22	22151939	A	C	0.852214	-0.0123582	0.00197668	4.1e-10
Childhood body size	rs9610387	22	36476762	G	A	0.914436	0.0137775	0.00250759	3.9e-08
Childhood body size	rs6001872	22	40703245	A	G	0.65069	0.0125519	0.0014723	1.5e-17
Childhood body size	rs9611560	22	41750622	T	C	0.261198	0.00935057	0.00161146	6.5e-09
Adult body size	rs115866895	1	1592638	A	G	0.736665	0.0120194	0.0015664	1.7e-14
Adult body size	rs200090476	1	1866376	G	A	0.497774	-0.0086627	0.00142916	1.3e-09
Adult body size	rs3762444	1	2427712	C	T	0.545548	0.0099367	0.00138419	7e-13
Adult body size	rs2076363	1	6684906	C	G	0.663112	-0.00803062	0.00145135	3.1e-08
Adult body size	rs4908677	1	7738180	C	T	0.520132	-0.00768754	0.00138197	2.7e-08
Adult body size	rs156880	1	16866033	C	T	0.509702	-0.00864481	0.00139131	5.2e-10
Adult body size	rs10799778	1	23313353	T	G	0.166193	0.0125819	0.00183897	7.8e-12
Adult body size	rs7511698	1	25015638	C	T	0.693718	0.00821032	0.00148524	3.2e-08
Adult body size	rs945211	1	32191798	G	C	0.384293	-0.00849357	0.0014077	1.6e-09
Adult body size	rs3737992	1	33234128	G	A	0.831	0.0137318	0.00182503	5.3e-14
Adult body size	rs12031634	1	34584393	G	A	0.703431	0.00880574	0.00150452	4.8e-09
Adult body size	rs13374459	1	39571211	T	C	0.588062	-0.00764911	0.00139248	3.9e-08
Adult body size	rs116195355	1	39941508	C	A	0.969118	0.0259588	0.00396473	5.9e-11
Adult body size	rs2744801	1	41155486	C	T	0.663446	0.0079536	0.00145216	4.3e-08
Adult body size	rs4660586	1	42407229	C	T	0.260631	0.00896084	0.00156363	1e-08
Adult body size	rs183315407	1	46201427	G	A	0.959739	0.0263723	0.0034926	4.3e-14
Adult body size	rs6669341	1	47678458	A	G	0.417338	0.0106846	0.0013873	1.3e-14
Adult body size	rs1167311	1	49996959	G	A	0.318742	0.0122534	0.00147912	1.2e-16
Adult body size	rs630602	1	54728864	G	C	0.393414	-0.00772636	0.00140837	4.1e-08
Adult body size	rs12140153	1	62579891	G	T	0.905761	0.0214472	0.00240105	4.2e-19
Adult body size	rs11208659	1	65979280	T	C	0.917081	-0.0139234	0.00248512	2.1e-08
Adult body size	rs7519259	1	66434743	G	A	0.471527	-0.00914331	0.00137713	3.2e-11
Adult body size	rs2613499	1	72751552	A	G	0.808963	0.0185702	0.00173761	1.2e-26
Adult body size	rs7553158	1	75005238	G	A	0.437549	0.0105556	0.00138011	2e-14
Adult body size	rs34517439	1	78450517	C	A	0.87821	-0.0246975	0.00211727	1.9e-31
Adult body size	rs575840515	1	80796649	A	G	0.709906	-0.00900837	0.00152109	3.2e-09
Adult body size	rs651533	1	82375561	T	A	0.243821	0.00929619	0.00159479	5.6e-09
Adult body size	rs28726372	1	84353839	T	C	0.692539	-0.00907801	0.00148344	9.4e-10
Adult body size	rs56270766	1	91200757	G	GT	0.631345	-0.00856797	0.00142412	1.8e-09
Adult body size	rs6679458	1	96946253	G	T	0.409353	-0.0115552	0.00138957	9.1e-17
Adult body size	rs12072739	1	98315893	A	G	0.77558	-0.0115866	0.00164338	1.8e-12
Adult body size	rs11434203	1	107623489	A	AC	0.342343	0.0083104	0.00146173	1.3e-08
Adult body size	rs41279738	1	110082551	T	G	0.974003	-0.0427759	0.00431814	3.9e-23
Adult body size	rs115056380	1	111338672	G	A	0.951606	0.0176449	0.00319183	3.2e-08
Adult body size	rs12033257	1	112318484	A	G	0.617867	0.00980287	0.0014192	4.9e-12
Adult body size	rs7549358	1	115252609	G	C	0.35571	0.00882987	0.00142922	6.5e-10
Adult body size	rs1409158	1	119538890	C	T	0.237368	0.00923072	0.00161087	1e-08
Adult body size	rs142315514	1	147050816	C	A	0.964594	-0.0213869	0.00379002	1.7e-08
Adult body size	rs772168224	1	151071560	CA	C	0.263042	0.0105124	0.00161178	6.9e-11
Adult body size	rs3753639	1	154986091	T	C	0.756236	-0.0114965	0.00160241	7.3e-13
Adult body size	rs61813324	1	156049877	C	T	0.864324	-0.0182963	0.00202748	1.8e-19
Adult body size	rs11264483	1	156406381	G	C	0.393088	-0.00870997	0.00141147	6.8e-10
Adult body size	rs4916229	1	171443368	C	G	0.904445	-0.0151299	0.00233311	8.9e-11
Adult body size	rs148137538	1	173399677	A	G	0.976551	0.0250491	0.00457729	4.4e-08
Adult body size	rs544871667	1	174497039	C	CT	0.93331	0.0193659	0.00314388	7.3e-10
Adult body size	rs539515	1	177889025	A	C	0.795046	-0.0301588	0.00169526	8.4e-71
Adult body size	rs746336168	1	184706212	GT	G	0.519387	-0.0081832	0.0013875	3.7e-09
Adult body size	rs815163	1	190294726	T	C	0.436787	0.0107541	0.00137834	6.1e-15
Adult body size	rs76702514	1	195148296	C	G	0.789394	0.0101367	0.001689	2e-09
Adult body size	rs12119733	1	196118341	G	C	0.958536	-0.0210022	0.00376994	2.5e-08
Adult body size	rs2678204	1	201800511	T	G	0.659718	-0.0150162	0.00144491	2.7e-25
Adult body size	rs4971239	1	203491150	G	A	0.830859	-0.0114876	0.00184196	4.5e-10
Adult body size	rs7539903	1	209208033	T	A	0.38457	0.0076915	0.00140708	4.6e-08
Adult body size	rs766615746	1	210336584	CTAAT	C	0.812405	-0.0112026	0.00175733	1.8e-10
Adult body size	rs12037905	1	219628036	C	T	0.580639	0.00792729	0.00138814	1.1e-08
Adult body size	rs7518221	1	225561346	T	C	0.352695	0.00795352	0.00143293	2.8e-08
Adult body size	rs59484402	1	230302838	C	CT	0.387968	0.0081248	0.00142268	1.1e-08
Adult body size	rs10927014	1	243592676	T	C	0.862138	0.0117586	0.00198471	3.1e-09
Adult body size	rs4658403	1	243832560	C	T	0.166309	0.0136423	0.00183985	1.2e-13
Adult body size	rs530265334	2	243567	T	TA	0.309533	0.00985906	0.0015073	6.1e-11
Adult body size	rs563738408	2	420443	G	A	0.966108	0.0635767	0.00389441	6.5e-60
Adult body size	rs143684747	2	633053	A	AC	0.171957	-0.0364525	0.00182023	3.2e-89
Adult body size	rs6752378	2	25150116	C	A	0.513963	-0.020021	0.00136857	1.8e-48
Adult body size	rs1631026	2	26953850	C	T	0.527217	-0.0107027	0.00137118	5.9e-15
Adult body size	rs373931589	2	27840772	C	CA	0.789332	-0.00968746	0.00173716	2.5e-08
Adult body size	rs10204994	2	35443726	G	A	0.77093	0.0101127	0.0016282	5.3e-10
Adult body size	rs10185199	2	40282202	G	A	0.71933	0.00999545	0.00156387	1.6e-10
Adult body size	rs10169594	2	41637688	T	C	0.636913	-0.00788339	0.0014266	3.3e-08
Adult body size	rs698807	2	44701659	G	C	0.240278	-0.00874262	0.00160355	5e-08
Adult body size	rs35809007	2	47019521	G	A	0.636705	0.0105922	0.00142731	1.2e-13
Adult body size	rs72618637	2	48953979	T	A	0.810545	0.0099921	0.00177487	1.8e-08
Adult body size	rs6761463	2	50201547	G	C	0.1622	0.0125814	0.00185776	1.3e-11
Adult body size	rs79552484	2	51086538	C	A	0.924694	-0.0146638	0.00259842	1.7e-08
Adult body size	rs59428052	2	53861389	A	G	0.851083	0.0114661	0.00199987	9.8e-09
Adult body size	rs7601895	2	55281901	C	G	0.692223	0.0103104	0.00148708	4.1e-12
Adult body size	rs77398625	2	57427287	G	C	0.96545	0.0215165	0.00394683	5e-08
Adult body size	rs4671328	2	58935282	T	G	0.448702	0.0131699	0.00138617	2.1e-21
Adult body size	rs7424120	2	59313974	C	T	0.398085	0.0142008	0.0014016	4e-24
Adult body size	rs4671358	2	60164634	T	A	0.407197	-0.00815477	0.00139495	5e-09
Adult body size	rs12477088	2	67841326	T	C	0.589752	0.0104671	0.00138822	4.7e-14
Adult body size	rs6752979	2	81741750	G	A	0.683257	-0.00895678	0.00146997	1.1e-09
Adult body size	rs396354	2	86850022	T	C	0.284406	0.0103984	0.0015204	8e-12
Adult body size	rs11691869	2	100805996	C	A	0.637766	0.0112311	0.00142704	3.5e-15
Adult body size	rs113822697	2	104232922	A	AT	0.503346	-0.00856981	0.0013974	8.6e-10
Adult body size	rs1451533	2	105466005	G	A	0.726343	-0.010968	0.00154606	1.3e-12
Adult body size	rs72851476	2	142874787	A	C	0.843679	0.0107274	0.00193252	2.8e-08
Adult body size	rs772724599	2	143992811	G	GTTT	0.870298	-0.0130679	0.00211263	6.2e-10
Adult body size	rs75706763	2	145669168	A	G	0.948316	-0.0177039	0.00313665	1.7e-08
Adult body size	rs409696	2	147900651	G	A	0.423716	0.0114218	0.00138666	1.8e-16
Adult body size	rs12692596	2	161265910	C	T	0.628118	-0.00815579	0.00141428	8.1e-09
Adult body size	rs12477385	2	166144850	G	T	0.7745	0.00924442	0.00164143	1.8e-08
Adult body size	rs560197932	2	172933248	C	CT	0.723761	-0.0103945	0.00157218	3.8e-11
Adult body size	rs72917533	2	175238924	T	C	0.814306	0.011462	0.00176411	8.2e-11
Adult body size	rs10174253	2	181323160	A	C	0.718219	-0.011209	0.00153204	2.5e-13
Adult body size	rs13001304	2	192949003	T	C	0.692591	0.00831773	0.00148691	2.2e-08
Adult body size	rs10641836	2	193812098	A	AGAT	0.455075	-0.00797582	0.00137375	6.4e-09
Adult body size	rs62277889	2	198783693	C	T	0.703219	0.0105949	0.00158158	2.1e-11
Adult body size	rs1704190	2	200760629	G	A	0.364025	-0.00833069	0.00142051	4.5e-09
Adult body size	rs559741848	2	203065430	C	CTTTTT	0.21443	0.0105598	0.00177629	2.8e-09
Adult body size	rs4482463	2	205375909	C	A	0.0770298	0.018863	0.00257351	2.3e-13
Adult body size	rs79675564	2	211286896	C	A	0.92234	-0.0150946	0.00255465	3.4e-09
Adult body size	rs13427822	2	213414265	A	G	0.728811	0.00944934	0.00155587	1.3e-09
Adult body size	rs34234485	2	219441689	C	CA	0.46095	0.00901826	0.00142592	2.5e-10
Adult body size	rs4674373	2	220156474	C	G	0.828879	0.0110506	0.0018176	1.2e-09
Adult body size	rs151252883	2	228998026	T	G	0.657996	-0.00921571	0.00144166	1.6e-10
Adult body size	rs2433733	2	230816703	G	A	0.322314	0.010504	0.00146427	7.3e-13
Adult body size	rs4663213	2	236807893	G	A	0.221788	0.0094607	0.00165947	1.2e-08
Adult body size	rs112380819	3	9498519	G	A	0.89762	-0.0136884	0.00225826	1.3e-09
Adult body size	rs17029006	3	12329452	C	T	0.72369	0.0103969	0.0015534	2.2e-11
Adult body size	rs540893248	3	12906432	C	T	0.993649	-0.0492496	0.00876622	1.9e-08
Adult body size	rs34373881	3	20432033	G	A	0.724699	0.00883268	0.00153671	9e-09
Adult body size	rs7619139	3	25110415	T	A	0.411293	-0.00884007	0.00139518	2.4e-10
Adult body size	rs80082536	3	35195311	A	G	0.87952	-0.0128944	0.00212463	1.3e-09
Adult body size	rs111768603	3	42329113	G	T	0.890178	0.0159053	0.00219022	3.8e-13
Adult body size	rs112046403	3	43155439	G	C	0.985361	-0.038022	0.00582921	6.9e-11
Adult body size	rs112401139	3	44263530	G	A	0.986709	-0.0410879	0.00650099	2.6e-10
Adult body size	rs9852062	3	45373442	T	A	0.44315	0.00817197	0.00138361	3.5e-09
Adult body size	rs113569731	3	47093206	C	A	0.90585	-0.0151686	0.00241102	3.1e-10
Adult body size	rs62261477	3	48779421	G	C	0.917922	-0.0187472	0.00250189	6.7e-14
Adult body size	rs9843653	3	49920571	T	C	0.488186	-0.0175503	0.00137056	1.5e-37
Adult body size	rs550730388	3	50818698	C	CT	0.479318	-0.00824805	0.00151238	4.9e-08
Adult body size	rs62259692	3	51847709	G	A	0.9386	-0.0177511	0.00293025	1.4e-09
Adult body size	rs6798941	3	52893465	C	T	0.704403	-0.0109993	0.00150528	2.7e-13
Adult body size	rs2680648	3	53777176	T	C	0.764703	0.00917472	0.00161747	1.4e-08
Adult body size	rs9840521	3	56250062	A	G	0.105038	0.012446	0.00223721	2.6e-08
Adult body size	rs6445198	3	61219865	G	T	0.584018	0.0109609	0.00139251	3.5e-15
Adult body size	rs76824303	3	62459819	A	C	0.900098	0.0151797	0.00234294	9.2e-11
Adult body size	rs557951	3	62713263	T	G	0.687123	-0.00813953	0.00148083	3.9e-08
Adult body size	rs11708540	3	70593081	G	A	0.84247	-0.0106156	0.00189063	2e-08
Adult body size	rs114728753	3	78483402	A	C	0.674753	-0.00895145	0.00146561	1e-09
Adult body size	rs34234711	3	82709447	G	T	0.638497	-0.00899034	0.00142493	2.8e-10
Adult body size	rs114593013	3	84113491	A	G	0.941951	0.0197179	0.00294476	2.1e-11
Adult body size	rs11915747	3	85699040	C	G	0.647257	0.010795	0.00143318	5e-14
Adult body size	rs4858940	3	88254820	T	C	0.114454	-0.013312	0.00215072	6e-10
Adult body size	rs7433076	3	90234502	T	A	0.522565	0.00951719	0.00137849	5.1e-12
Adult body size	rs1454687	3	94038085	C	G	0.484614	0.0122831	0.00136952	3e-19
Adult body size	rs1436348	3	104612668	A	G	0.417165	-0.00966304	0.00138887	3.5e-12
Adult body size	rs36131051	3	107888841	T	G	0.794869	0.0107943	0.00171155	2.9e-10
Adult body size	rs80082351	3	114415926	A	G	0.938199	0.018501	0.00284688	8.1e-11
Adult body size	rs1066603	3	118047858	A	G	0.262537	0.00849104	0.00155751	5e-08
Adult body size	rs9814758	3	123062657	T	G	0.6439	0.00838747	0.00143726	5.4e-09
Adult body size	rs57654548	3	125196904	C	A	0.873846	0.0116291	0.00212161	4.2e-08
Adult body size	rs112859723	3	131625376	T	C	0.842887	0.0111434	0.00191128	5.5e-09
Adult body size	rs1320903	3	131758077	G	A	0.68029	-0.0146157	0.00146919	2.6e-23
Adult body size	rs10935143	3	134665159	G	A	0.551499	0.00839848	0.00137905	1.1e-09
Adult body size	rs2343681	3	136535024	G	A	0.210923	-0.0123563	0.00167752	1.8e-13
Adult body size	rs2035936	3	141298124	G	T	0.944091	-0.0221545	0.00302303	2.3e-13
Adult body size	rs12634936	3	147716498	T	C	0.943292	-0.0181042	0.00314699	8.8e-09
Adult body size	rs1568488	3	153657951	G	C	0.405272	-0.0110252	0.00140599	4.4e-15
Adult body size	rs9834519	3	156379637	C	T	0.918866	0.015592	0.0025405	8.4e-10
Adult body size	rs34413363	3	156959498	T	TA	0.702586	-0.00907217	0.00156536	6.8e-09
Adult body size	rs759541351	3	158019780	GT	G	0.489116	0.00819813	0.00141269	6.5e-09
Adult body size	rs8192675	3	170724883	T	C	0.711353	-0.0117042	0.00150889	8.7e-15
Adult body size	rs529200	3	173114305	A	G	0.47215	-0.0103148	0.00137304	5.8e-14
Adult body size	rs13061117	3	181186466	T	C	0.909819	-0.0146976	0.00242091	1.3e-09
Adult body size	rs262956	3	183486117	T	G	0.353154	0.00911918	0.00143655	2.2e-10
Adult body size	rs869400	3	185826740	T	G	0.185088	-0.0183105	0.00176638	3.5e-25
Adult body size	rs80236973	3	188001014	C	T	0.86542	0.0121589	0.0020083	1.4e-09
Adult body size	rs4677813	3	194863860	T	C	0.750189	0.00893255	0.00158099	1.6e-08
Adult body size	rs6583310	3	196170985	G	C	0.561245	-0.00878295	0.0013839	2.2e-10
Adult body size	rs2051559	4	3298800	T	C	0.867546	-0.0138644	0.00202875	8.3e-12
Adult body size	rs35852935	4	17991522	A	C	0.964436	-0.0218858	0.00374062	4.9e-09
Adult body size	rs1477890	4	18511738	A	G	0.50706	-0.00977959	0.00137366	1.1e-12
Adult body size	rs544200874	4	20124826	C	T	0.91859	-0.0176783	0.0027129	7.2e-11
Adult body size	rs34811474	4	25408838	G	A	0.76914	0.0165964	0.00162688	2e-24
Adult body size	rs73213484	4	28489339	A	T	0.858841	0.0146376	0.00197063	1.1e-13
Adult body size	rs4527444	4	30842780	A	G	0.458691	-0.00939213	0.00137682	9e-12
Adult body size	rs36023504	4	38698924	C	T	0.617088	0.00777395	0.00142237	4.6e-08
Adult body size	rs12507026	4	45181334	A	T	0.565253	-0.0186737	0.00138436	1.8e-41
Adult body size	rs2237025	4	55541879	T	C	0.444505	0.0102433	0.00139113	1.8e-13
Adult body size	rs28462076	4	65696174	A	G	0.761729	0.00939268	0.00162009	6.7e-09
Adult body size	rs2164300	4	67813017	C	T	0.480766	0.00754945	0.00137666	4.2e-08
Adult body size	rs13104584	4	80811227	G	A	0.592379	-0.00864396	0.00139769	6.2e-10
Adult body size	rs2199936	4	89045331	A	G	0.113611	-0.0143797	0.00215618	2.6e-11
Adult body size	rs4419475	4	96150044	A	T	0.59261	-0.00809618	0.00139493	6.5e-09
Adult body size	rs1229984	4	100239319	T	C	0.0271609	-0.02304	0.00416449	3.2e-08
Adult body size	rs2583410	4	102182199	A	C	0.853006	-0.0133529	0.00193619	5.3e-12
Adult body size	rs13107325	4	103188709	C	T	0.92511	-0.0287138	0.00260568	3.1e-28
Adult body size	rs57590313	4	113323430	C	A	0.80729	-0.0101728	0.00178824	1.3e-08
Adult body size	rs2952863	4	130759647	T	G	0.291024	0.00963412	0.00150661	1.6e-10
Adult body size	rs1296328	4	137083193	A	C	0.440914	0.0117384	0.00138729	2.6e-17
Adult body size	rs809955	4	140874760	G	A	0.633959	0.0101003	0.00142485	1.4e-12
Adult body size	rs201955412	4	143668329	G	GA	0.629764	-0.00796026	0.00142182	2.2e-08
Adult body size	rs28839214	4	145313641	G	T	0.601042	-0.00891646	0.00140514	2.2e-10
Adult body size	rs6823268	4	145982563	A	G	0.628532	-0.0081752	0.00141821	8.2e-09
Adult body size	rs113079574	4	147354089	C	T	0.807329	0.00965155	0.0017463	3.3e-08
Adult body size	rs6843852	4	162132758	C	T	0.492297	-0.00871909	0.00137121	2e-10
Adult body size	rs757215203	4	170904080	CA	C	0.731158	-0.00926726	0.00158009	4.5e-09
Adult body size	rs698147	5	3513485	A	G	0.456461	0.00877987	0.0013771	1.8e-10
Adult body size	rs796338714	5	43190861	T	TA	0.414092	-0.00965503	0.0014407	2.1e-11
Adult body size	rs114263339	5	50932343	C	T	0.974247	-0.0252802	0.00432869	5.2e-09
Adult body size	rs10805383	5	63034606	G	A	0.519459	-0.0104667	0.00137409	2.6e-14
Adult body size	rs12518987	5	63967322	A	G	0.64693	-0.0101776	0.00144657	2e-12
Adult body size	rs539787360	5	66162744	TTTTG	T	0.364134	-0.00819215	0.0014334	1.1e-08
Adult body size	rs27215	5	66219318	C	A	0.274935	-0.0102695	0.00156368	5.1e-11
Adult body size	rs2307111	5	75003678	T	C	0.604907	0.0167553	0.00140266	6.9e-33
Adult body size	rs252749	5	77389973	G	A	0.754126	0.00951744	0.00158929	2.1e-09
Adult body size	rs59893724	5	80830788	A	G	0.756352	0.0114154	0.00159677	8.7e-13
Adult body size	rs6452788	5	87712913	G	A	0.759627	0.0115991	0.00160467	4.9e-13
Adult body size	rs1477290	5	87988934	T	C	0.862972	-0.0199356	0.00200994	3.5e-23
Adult body size	rs35843836	5	88798726	A	T	0.632745	-0.00944941	0.0014224	3.1e-11
Adult body size	rs142503704	5	92622421	G	A	0.97711	-0.0262684	0.00467519	1.9e-08
Adult body size	rs55838622	5	95711605	A	C	0.753648	-0.00989605	0.00164361	1.7e-09
Adult body size	rs34073570	5	103998895	C	CT	0.601006	0.00781924	0.00140667	2.7e-08
Adult body size	rs56220792	5	105874890	C	CT	0.423587	-0.00826809	0.00139783	3.3e-09
Adult body size	rs62355615	5	106877108	T	C	0.778209	-0.00930054	0.00169717	4.3e-08
Adult body size	rs10623997	5	107478679	T	TATAATA	0.761348	0.0142506	0.00165858	8.5e-18
Adult body size	rs12517187	5	112444682	C	T	0.565455	-0.00824621	0.00138786	2.8e-09
Adult body size	rs347551	5	119389031	C	G	0.527662	-0.00889176	0.00139474	1.8e-10
Adult body size	rs34732995	5	122699198	C	CTA	0.538293	0.00994557	0.0013749	4.7e-13
Adult body size	rs329118	5	133861663	C	T	0.580515	0.00948808	0.00139007	8.8e-12
Adult body size	rs13174863	5	139080745	A	G	0.851925	-0.0136233	0.00194393	2.4e-12
Adult body size	rs114285050	5	145895394	G	A	0.991861	0.043694	0.00761828	9.7e-09
Adult body size	rs2974550	5	152053480	T	G	0.115109	0.0128534	0.0021599	2.7e-09
Adult body size	rs12658841	5	153106013	C	G	0.56319	0.00821725	0.00138423	2.9e-09
Adult body size	rs7719067	5	153538241	A	G	0.427582	0.0093096	0.00138359	1.7e-11
Adult body size	rs11134512	5	167847460	T	G	0.676993	0.00824166	0.00146708	1.9e-08
Adult body size	rs11134679	5	170623391	A	G	0.3153	-0.0124028	0.00147968	5.2e-17
Adult body size	rs192829047	5	173277247	T	C	0.984352	-0.0321157	0.00578446	2.8e-08
Adult body size	rs4467770	6	12086826	G	A	0.268921	-0.00986966	0.00155197	2e-10
Adult body size	rs9395520	6	13183523	C	T	0.695664	0.00975752	0.00149027	5.9e-11
Adult body size	rs11758033	6	14129616	C	T	0.860688	0.0117726	0.00198951	3.3e-09
Adult body size	rs9477762	6	18507853	A	T	0.945907	-0.0201859	0.00305238	3.8e-11
Adult body size	rs3806114	6	20482335	G	A	0.331743	0.00878865	0.00147166	2.3e-09
Adult body size	rs75499503	6	26145217	C	T	0.77991	0.0114761	0.00167813	8e-12
Adult body size	rs34388845	6	28578286	A	G	0.786103	-0.0122774	0.00166938	1.9e-13
Adult body size	rs1632887	6	29909217	T	G	0.725853	-0.0110934	0.00156809	1.5e-12
Adult body size	rs2260051	6	31591918	A	T	0.438452	-0.011743	0.00137839	1.6e-17
Adult body size	rs2858314	6	32663448	G	A	0.764547	0.00892841	0.00161543	3.3e-08
Adult body size	rs9277992	6	33312455	G	A	0.810445	-0.0132109	0.00175805	5.7e-14
Adult body size	rs1555686	6	33833187	A	G	0.705432	0.00897788	0.00154161	5.8e-09
Adult body size	rs113344808	6	34701981	C	CATTT	0.684943	-0.0181376	0.0014944	6.7e-34
Adult body size	rs34298980	6	40409243	T	C	0.491242	0.0132574	0.00144434	4.4e-20
Adult body size	rs4714431	6	41168337	A	C	0.625454	0.00789875	0.00141412	2.3e-08
Adult body size	rs567230078	6	43588227	T	A	0.973181	0.0250634	0.00424894	3.7e-09
Adult body size	rs72892910	6	50816887	G	T	0.827755	-0.0252844	0.00181803	5.7e-44
Adult body size	rs10650639	6	51476169	C	CA	0.381715	-0.00878991	0.00146605	2e-09
Adult body size	rs112637668	6	51823612	T	TACAC	0.497107	-0.00983596	0.00140243	2.3e-12
Adult body size	rs200769207	6	64174931	C	CA	0.500712	-0.0082259	0.00143587	1e-08
Adult body size	rs72910629	6	69761994	A	G	0.864006	-0.0132548	0.00201085	4.3e-11
Adult body size	rs1040046	6	83473573	C	A	0.850588	-0.0112601	0.00192094	4.6e-09
Adult body size	rs1324110	6	93913200	G	C	0.557284	0.00776998	0.00138403	2e-08
Adult body size	rs6938973	6	98421721	T	C	0.398676	-0.0118066	0.00140063	3.5e-17
Adult body size	rs9496567	6	100602753	G	A	0.756637	-0.00938815	0.00160014	4.4e-09
Adult body size	rs557114450	6	104819501	G	GA	0.807054	0.0107197	0.00176264	1.2e-09
Adult body size	rs2253310	6	108888593	C	G	0.373748	-0.0105591	0.00141638	9e-14
Adult body size	rs13218383	6	120173501	C	G	0.664927	0.00931833	0.00145169	1.4e-10
Adult body size	rs2875762	6	124925032	G	C	0.757091	-0.0110373	0.00160426	6e-12
Adult body size	rs10457469	6	126083658	G	A	0.476422	-0.00763453	0.00137206	2.6e-08
Adult body size	rs2749929	6	131859814	T	C	0.790267	-0.00918958	0.00168586	5e-08
Adult body size	rs12213441	6	143208838	C	T	0.770897	-0.0105064	0.00167201	3.3e-10
Adult body size	rs7749708	6	153375907	C	T	0.706341	-0.00998267	0.00150851	3.7e-11
Adult body size	rs9478496	6	154333183	T	C	0.835791	-0.0116188	0.00185594	3.8e-10
Adult body size	rs9480184	6	155987788	C	T	0.789213	-0.0098556	0.00168442	4.9e-09
Adult body size	rs36007635	6	163009335	G	A	0.862284	0.0137121	0.00199026	5.6e-12
Adult body size	rs756700851	7	1271233	CT	C	0.204375	-0.0095867	0.00170278	1.8e-08
Adult body size	rs2056477	7	2079744	G	C	0.771778	0.0115643	0.00163545	1.5e-12
Adult body size	rs35585441	7	5539725	T	TA	0.165794	0.0114045	0.00203619	2.1e-08
Adult body size	rs4307239	7	24354300	A	G	0.541187	-0.00769099	0.00137898	2.4e-08
Adult body size	rs215634	7	32369148	A	G	0.388097	0.0104342	0.00141137	1.4e-13
Adult body size	rs2237402	7	39449768	G	A	0.660972	0.00922809	0.00144668	1.8e-10
Adult body size	rs2289379	7	44804225	C	T	0.60427	0.00975934	0.00140786	4.1e-12
Adult body size	rs3823674	7	50571996	C	T	0.572244	0.00765672	0.00138882	3.5e-08
Adult body size	rs11765062	7	54417515	T	C	0.45926	0.00751629	0.00137499	4.6e-08
Adult body size	rs2866720	7	70106310	C	T	0.614657	-0.00912913	0.0014182	1.2e-10
Adult body size	rs236660	7	75050086	T	C	0.428913	-0.0144693	0.00143954	9.1e-24
Adult body size	rs3748126	7	76632736	C	G	0.187649	0.0165225	0.00182279	1.3e-19
Adult body size	rs740157	7	77055885	A	G	0.43255	0.00761723	0.00138996	4.2e-08
Adult body size	rs3840590	7	77827064	G	GA	0.647187	0.00970576	0.00145138	2.3e-11
Adult body size	rs6963840	7	78144371	C	T	0.844199	-0.0129345	0.00189361	8.5e-12
Adult body size	rs12538826	7	99030228	T	C	0.885558	0.0167586	0.00215398	7.2e-15
Adult body size	rs141729983	7	100803245	G	GCA	0.468711	0.00856336	0.00143408	2.4e-09
Adult body size	rs11496125	7	103417557	C	T	0.5748	-0.0109238	0.00139455	4.8e-15
Adult body size	rs1851823	7	109218983	C	A	0.511629	-0.00753654	0.00137512	4.2e-08
Adult body size	rs2396625	7	113028634	T	A	0.57862	0.00993598	0.0013964	1.1e-12
Adult body size	rs1840660	7	114352615	G	A	0.611666	-0.00995498	0.00141493	2e-12
Adult body size	rs1899689	7	121964349	C	T	0.610356	-0.00773624	0.00140509	3.7e-08
Adult body size	rs35775580	7	130420740	A	G	0.953004	0.0180149	0.00324057	2.7e-08
Adult body size	rs34222832	7	137410348	T	TA	0.661605	-0.00828615	0.00146433	1.5e-08
Adult body size	rs11525873	7	138817193	T	C	0.902215	0.014829	0.00231302	1.4e-10
Adult body size	rs1805123	7	150645534	T	G	0.75472	0.0110468	0.00159322	4.1e-12
Adult body size	rs7827182	8	8380471	G	C	0.51076	-0.0112266	0.00137268	2.9e-16
Adult body size	rs6601451	8	10243681	C	G	0.48458	0.0115699	0.00137389	3.7e-17
Adult body size	rs55896564	8	11447093	G	A	0.465195	0.0116966	0.00138218	2.6e-17
Adult body size	rs6530737	8	14095763	A	G	0.348838	0.00901865	0.00143697	3.5e-10
Adult body size	rs71211068	8	15538727	C	CT	0.224314	-0.00986952	0.00175962	2e-08
Adult body size	rs2616143	8	20632022	G	A	0.680028	0.00884801	0.00147397	1.9e-09
Adult body size	rs117176448	8	27261138	C	G	0.903818	-0.0149728	0.00232404	1.2e-10
Adult body size	rs11412805	8	28051289	A	AG	0.115554	0.0128512	0.00225771	1.3e-08
Adult body size	rs2725371	8	30854033	A	G	0.303859	0.0100376	0.0014969	2e-11
Adult body size	rs4739558	8	38337264	A	G	0.399483	0.00809748	0.00140056	7.4e-09
Adult body size	rs35894137	8	43071838	C	T	0.919131	0.014227	0.00251993	1.6e-08
Adult body size	rs201180329	8	47858698	G	GA	0.969234	0.0225818	0.00409803	3.6e-08
Adult body size	rs473837	8	60906881	G	T	0.64772	0.00863143	0.00143586	1.8e-09
Adult body size	rs12681792	8	62054463	C	A	0.807463	-0.0095618	0.00174588	4.3e-08
Adult body size	rs4737188	8	64756657	A	T	0.526114	0.00831249	0.00137495	1.5e-09
Adult body size	rs72652703	8	67209548	T	C	0.744433	0.00992488	0.001578	3.2e-10
Adult body size	rs35957544	8	73440371	G	T	0.425673	0.0126785	0.00139004	7.4e-20
Adult body size	rs35853762	8	77235251	T	TG	0.436918	-0.0116254	0.0013872	5.3e-17
Adult body size	rs78565420	8	85703065	C	T	0.948091	-0.018757	0.00315301	2.7e-09
Adult body size	rs151288063	8	87770735	C	CAT	0.836405	-0.0105531	0.00186078	1.4e-08
Adult body size	rs1905616	8	93235675	G	A	0.66871	0.00819683	0.00145677	1.8e-08
Adult body size	rs2114210	8	95595162	G	A	0.664094	-0.00986173	0.00145393	1.2e-11
Adult body size	rs17716502	8	116659731	C	T	0.795594	0.0162355	0.00171408	2.7e-21
Adult body size	rs72673947	8	118884379	A	G	0.893101	-0.0140208	0.00223036	3.3e-10
Adult body size	rs112875651	8	126506694	G	A	0.608886	-0.00835363	0.00142292	4.3e-09
Adult body size	rs11782074	8	142617096	G	T	0.616385	-0.00971808	0.00143319	1.2e-11
Adult body size	rs13275517	8	143364521	T	C	0.543763	-0.00814992	0.00138623	4.1e-09
Adult body size	rs10115920	9	6926233	G	A	0.348576	-0.00828956	0.00144216	9e-09
Adult body size	rs1865341	9	8845911	C	T	0.238421	-0.00899606	0.00161509	2.5e-08
Adult body size	rs10960276	9	11819686	C	A	0.644607	0.00809436	0.00143164	1.6e-08
Adult body size	rs7020196	9	12289527	C	T	0.419679	0.00778854	0.00141323	3.6e-08
Adult body size	rs10756555	9	14459089	G	A	0.539336	0.0102529	0.00138891	1.6e-13
Adult body size	rs13292699	9	15910044	A	C	0.566335	0.0125361	0.00138627	1.5e-19
Adult body size	rs10962547	9	16712247	T	A	0.827856	-0.013335	0.00182224	2.5e-13
Adult body size	rs17770336	9	28414625	C	T	0.677521	-0.0155163	0.00146443	3.1e-26
Adult body size	rs10969334	9	29717279	C	A	0.606447	0.00867165	0.00140574	6.9e-10
Adult body size	rs544957562	9	33978015	A	T	0.845581	0.0123934	0.00202306	9e-10
Adult body size	rs10973159	9	36992547	G	T	0.379951	-0.00805227	0.00141346	1.2e-08
Adult body size	rs7038966	9	73777777	C	T	0.588642	-0.00947635	0.00140121	1.4e-11
Adult body size	rs10649715	9	87396326	T	TCATAA	0.962304	-0.0203646	0.00368628	3.3e-08
Adult body size	rs34696009	9	96395221	G	GCTGT	0.324404	0.0110587	0.00147711	7.1e-14
Adult body size	rs1547205	9	98815145	G	C	0.900067	0.0132049	0.00232169	1.3e-08
Adult body size	rs4989244	9	102100348	G	A	0.567822	0.00763477	0.00138564	3.6e-08
Adult body size	rs3931548	9	103113652	C	A	0.618149	-0.0105077	0.0014385	2.8e-13
Adult body size	rs2135745	9	109150784	C	G	0.2485	0.00912756	0.00159545	1.1e-08
Adult body size	rs2417998	9	111958746	C	G	0.291576	0.00841353	0.00151559	2.8e-08
Adult body size	rs12376870	9	117890567	G	A	0.762383	0.00886599	0.00161573	4.1e-08
Adult body size	rs7038943	9	120377178	T	C	0.661365	0.00926108	0.00144711	1.6e-10
Adult body size	rs6478538	9	124627012	A	G	0.322821	0.00881355	0.00146753	1.9e-09
Adult body size	rs10760277	9	126093999	C	T	0.614902	-0.00886536	0.00141365	3.6e-10
Adult body size	rs7030609	9	129415775	A	G	0.910471	-0.0151409	0.00241294	3.5e-10
Adult body size	rs113132247	9	131026108	G	A	0.846977	-0.0123286	0.0019113	1.1e-10
Adult body size	rs6597653	9	133788465	G	C	0.602596	-0.0085299	0.00140699	1.3e-09
Adult body size	rs7913496	10	10257277	C	T	0.179662	0.0100297	0.00178629	2e-08
Adult body size	rs7893571	10	16750129	G	T	0.334299	-0.0101768	0.00145748	2.9e-12
Adult body size	rs11275375	10	21839820	T	TAATTAAAAATTATGTGAAAAC	0.675793	-0.0135897	0.00146441	1.7e-20
Adult body size	rs71495049	10	34014435	G	A	0.916465	-0.0170656	0.00247827	5.7e-12
Adult body size	rs10823826	10	53649431	C	T	0.751302	-0.00897916	0.00158888	1.6e-08
Adult body size	rs3125326	10	63053788	A	C	0.39151	-0.00789262	0.00141947	2.7e-08
Adult body size	rs7924036	10	65191645	G	T	0.49667	0.0096342	0.00137162	2.2e-12
Adult body size	rs562044398	10	76101122	C	CA	0.868335	-0.0142244	0.00206403	5.5e-12
Adult body size	rs1250597	10	81010250	A	G	0.405167	-0.00853653	0.00139856	1e-09
Adult body size	rs17399739	10	87490850	A	G	0.931102	-0.0177508	0.00271192	5.9e-11
Adult body size	rs11201985	10	88097795	G	A	0.548559	-0.00755642	0.00138618	5e-08
Adult body size	rs2450444	10	93010383	G	A	0.651052	0.00807358	0.00143771	2e-08
Adult body size	rs12357890	10	99762693	A	G	0.442815	-0.0121927	0.00138837	1.6e-18
Adult body size	rs41310284	10	102447647	C	A	0.898985	0.0177406	0.00229148	9.8e-15
Adult body size	rs548235873	10	104633053	A	ATTT	0.778185	-0.0105358	0.00165814	2.1e-10
Adult body size	rs4575195	10	114765747	C	A	0.686634	0.00959417	0.00147977	9e-11
Adult body size	rs9421249	10	118623322	C	T	0.739061	-0.0104412	0.00156447	2.5e-11
Adult body size	rs845084	10	125220036	G	A	0.741579	-0.00985344	0.00157289	3.7e-10
Adult body size	rs141090474	10	126729168	TAC	T	0.465629	0.0101989	0.00141546	5.8e-13
Adult body size	rs2542615	10	131128952	C	T	0.342139	0.00843562	0.00145857	7.3e-09
Adult body size	rs201102222	10	134005569	A	AT	0.433994	0.00957927	0.00138956	5.4e-12
Adult body size	rs7103389	11	881639	T	C	0.382148	-0.00946008	0.00142256	2.9e-11
Adult body size	rs67257872	11	8530218	A	G	0.553292	0.0105979	0.00137933	1.5e-14
Adult body size	rs28711392	11	13349559	T	C	0.632865	0.0117792	0.00143412	2.1e-16
Adult body size	rs6265	11	27679916	C	T	0.811547	0.0245417	0.00175291	1.5e-44
Adult body size	rs10835498	11	29258947	G	A	0.5691	-0.00797756	0.00138744	8.9e-09
Adult body size	rs1222216	11	30346052	C	T	0.773735	0.0121516	0.00163666	1.1e-13
Adult body size	rs77762353	11	43648786	A	AT	0.311701	0.0151745	0.00148535	1.7e-24
Adult body size	rs7936030	11	45351472	A	G	0.17809	-0.00982949	0.00179184	4.1e-08
Adult body size	rs555754158	11	46141511	G	A	0.987473	-0.0387031	0.00666806	6.5e-09
Adult body size	rs12798028	11	47604639	C	T	0.591453	-0.0150337	0.00139188	3.4e-27
Adult body size	rs12363672	11	55684028	A	C	0.973835	-0.0238392	0.00429171	2.8e-08
Adult body size	rs34292685	11	64049021	C	T	0.838208	0.0127228	0.00185993	7.9e-12
Adult body size	rs559487775	11	65596509	T	TA	0.651686	-0.0136274	0.00147498	2.5e-20
Adult body size	rs667515	11	69449076	G	C	0.613852	0.00867297	0.00141298	8.4e-10
Adult body size	rs112326082	11	76479391	A	AGCCTTCCT	0.790995	0.00956113	0.00173613	3.6e-08
Adult body size	rs7102934	11	84648068	T	C	0.687506	-0.00907898	0.00149355	1.2e-09
Adult body size	rs61903695	11	89922417	A	G	0.745081	-0.0113248	0.00157548	6.6e-13
Adult body size	rs2658797	11	93212254	C	T	0.517623	0.00779058	0.00137105	1.3e-08
Adult body size	rs680071	11	103088414	T	C	0.119403	-0.0117393	0.0021142	2.8e-08
Adult body size	rs719802	11	113234679	T	C	0.385578	0.00820044	0.0014076	5.7e-09
Adult body size	rs11607476	11	115037061	A	C	0.51337	-0.00986565	0.00138141	9.2e-13
Adult body size	rs12281009	11	117032959	A	G	0.942445	-0.0178672	0.00294699	1.3e-09
Adult body size	rs7925100	11	118941596	G	A	0.603989	-0.00916807	0.00140267	6.3e-11
Adult body size	rs11218510	11	121922587	G	A	0.599589	0.0080957	0.00140221	7.8e-09
Adult body size	rs199569565	11	130749351	TAG	T	0.465898	-0.00923874	0.00137818	2e-11
Adult body size	rs12788343	11	131452912	T	C	0.590818	-0.00965197	0.00139325	4.3e-12
Adult body size	rs11222940	11	131985721	C	A	0.671443	0.00849569	0.00146531	6.7e-09
Adult body size	rs11223204	11	132652554	A	G	0.565776	-0.00873553	0.00138674	3e-10
Adult body size	rs329651	11	133767622	G	T	0.196058	-0.0110894	0.00173557	1.7e-10
Adult body size	rs61909165	11	134589355	T	A	0.826017	-0.012264	0.00182095	1.6e-11
Adult body size	rs55726687	12	991306	G	A	0.79024	-0.0137557	0.00168297	3e-16
Adult body size	rs10774018	12	2157925	G	C	0.779662	-0.0094769	0.00165987	1.1e-08
Adult body size	rs1799507	12	16427314	G	A	0.856437	-0.0108354	0.00195679	3.1e-08
Adult body size	rs10505836	12	19288508	A	C	0.139921	-0.0121361	0.00199185	1.1e-09
Adult body size	rs10842231	12	23986029	A	T	0.916952	-0.0144323	0.00250521	8.4e-09
Adult body size	rs1458156	12	41887940	C	T	0.511511	-0.00928804	0.00137304	1.3e-11
Adult body size	rs7132908	12	50263148	G	A	0.615537	-0.0186209	0.00141036	8.4e-40
Adult body size	rs4077093	12	51593616	T	G	0.215777	0.00969144	0.00167974	7.9e-09
Adult body size	rs4759073	12	54653258	G	A	0.590095	0.00934791	0.00139222	1.9e-11
Adult body size	rs4759228	12	56508409	G	C	0.704732	0.011615	0.00150727	1.3e-14
Adult body size	rs12821416	12	58580570	C	T	0.864002	-0.0113929	0.0019995	1.2e-08
Adult body size	rs61754230	12	72179446	C	T	0.980265	-0.0273798	0.0049283	2.8e-08
Adult body size	rs12427047	12	90213070	C	T	0.757298	0.0109098	0.00159892	8.9e-12
Adult body size	rs2712667	12	99588917	G	C	0.356054	0.00962407	0.00143716	2.1e-11
Adult body size	rs35159593	12	103651399	G	GA	0.673906	0.0120213	0.00146779	2.6e-16
Adult body size	rs61217499	12	108417780	G	C	0.780037	0.0127589	0.00167171	2.3e-14
Adult body size	rs117249174	12	110043679	C	T	0.920308	-0.0139769	0.00252883	3.3e-08
Adult body size	rs6606686	12	110903380	G	C	0.319388	0.00974754	0.00147061	3.4e-11
Adult body size	rs11513729	12	112273499	C	T	0.58693	0.00799293	0.00141154	1.5e-08
Adult body size	rs181617194	12	122011598	T	C	0.958742	0.0226623	0.00376431	1.7e-09
Adult body size	rs147730268	12	123024476	G	T	0.912739	0.0228315	0.00248522	4e-20
Adult body size	rs117711868	12	123540756	G	A	0.978096	-0.0257578	0.00471949	4.8e-08
Adult body size	rs752843328	12	124500722	GAA	G	0.778035	-0.0107115	0.00167115	1.5e-10
Adult body size	rs35221880	12	133301500	T	C	0.268227	0.00857287	0.00155424	3.5e-08
Adult body size	rs9579775	13	20616557	A	C	0.864423	-0.0146498	0.00208415	2.1e-12
Adult body size	rs9507791	13	27352678	G	A	0.212936	0.00988442	0.00168301	4.3e-09
Adult body size	rs1967772	13	28036062	G	A	0.714944	0.0109369	0.00152786	8.2e-13
Adult body size	rs9579151	13	28643878	C	G	0.823078	-0.0104841	0.0017994	5.7e-09
Adult body size	rs149778057	13	31007805	A	C	0.671468	0.00904547	0.00153465	3.8e-09
Adult body size	rs35193668	13	33092929	C	T	0.63894	0.0104702	0.00143054	2.5e-13
Adult body size	rs61954177	13	40787036	G	C	0.672805	-0.00872725	0.00146694	2.7e-09
Adult body size	rs12429545	13	54102206	G	A	0.870646	-0.0200311	0.00206205	2.6e-22
Adult body size	rs9317002	13	59175727	C	A	0.485411	-0.0113783	0.00138238	1.9e-16
Adult body size	rs755841629	13	62713381	TGTGACTAATTTTCTTCTATAAG	T	0.651176	-0.00897475	0.00152819	4.3e-09
Adult body size	rs5804250	13	66204127	C	CT	0.424661	0.00772836	0.00139622	3.1e-08
Adult body size	rs776543236	13	67348551	ATGGAG	A	0.747434	-0.010055	0.00162313	5.8e-10
Adult body size	rs1576655	13	79587841	A	C	0.404079	-0.0113489	0.00142746	1.9e-15
Adult body size	rs61971082	13	86494667	T	G	0.716165	-0.0101252	0.00152324	3e-11
Adult body size	rs7990098	13	96982541	T	G	0.587612	-0.00915821	0.00139468	5.1e-11
Adult body size	rs56728797	13	99243572	G	GA	0.695496	0.00911511	0.00151236	1.7e-09
Adult body size	rs9888533	13	107854612	C	T	0.461906	-0.00765412	0.00139943	4.5e-08
Adult body size	rs9515446	13	112217108	A	G	0.552223	-0.00969209	0.00138007	2.2e-12
Adult body size	rs8015400	14	25930988	C	A	0.323165	-0.0126459	0.00146766	6.9e-18
Adult body size	rs9788550	14	29681138	G	C	0.75258	0.0137871	0.00159576	5.6e-18
Adult body size	rs760268998	14	30090307	C	CAC	0.536683	0.0089972	0.0015393	5.1e-09
Adult body size	rs61979560	14	30727033	C	A	0.708523	-0.00838814	0.00153788	4.9e-08
Adult body size	rs12883788	14	33303540	C	T	0.540271	-0.0124311	0.00138188	2.3e-19
Adult body size	rs774289218	14	35331997	A	AAC	0.925182	0.0166219	0.00285701	6e-09
Adult body size	rs534930508	14	40104783	A	AGGAGT	0.86564	-0.0135396	0.00211071	1.4e-10
Adult body size	rs68069729	14	40762264	T	C	0.810281	0.0107263	0.00175131	9.1e-10
Adult body size	rs8011566	14	42939471	T	A	0.574127	-0.00873021	0.00139086	3.5e-10
Adult body size	rs34688745	14	47298299	T	TA	0.502102	0.0104773	0.00139256	5.3e-14
Adult body size	rs217672	14	62361021	A	C	0.72828	-0.0118089	0.00154676	2.3e-14
Adult body size	rs3902951	14	69789755	T	G	0.762853	-0.010523	0.00163159	1.1e-10
Adult body size	rs61986330	14	73314450	C	A	0.725696	0.00873325	0.00153905	1.4e-08
Adult body size	rs10146997	14	79945162	A	G	0.778004	-0.0159997	0.00165074	3.2e-22
Adult body size	rs8008772	14	88321884	A	T	0.749476	-0.00926237	0.00159022	5.7e-09
Adult body size	rs1286138	14	91485445	T	G	0.325079	-0.00900388	0.00146728	8.4e-10
Adult body size	rs6575340	14	94023972	G	A	0.363991	-0.0133217	0.00142984	1.2e-20
Adult body size	rs12885251	14	99670791	G	A	0.54166	0.00762803	0.00139078	4.1e-08
Adult body size	rs12147845	14	101144596	C	T	0.88381	-0.0135688	0.00214705	2.6e-10
Adult body size	rs61992671	14	101531854	A	G	0.507904	0.00988005	0.00143461	5.7e-12
Adult body size	rs2448241	14	102414767	G	A	0.899795	0.0132839	0.00231019	8.9e-09
Adult body size	rs7145882	14	103255461	T	C	0.34231	0.0114597	0.00144519	2.2e-15
Adult body size	rs12891477	14	104332759	C	T	0.631592	-0.00878376	0.00143047	8.2e-10
Adult body size	rs76520838	15	47916618	C	T	0.966576	-0.0232182	0.00386698	1.9e-09
Adult body size	rs7182917	15	52080803	T	C	0.549911	0.00873699	0.00138531	2.8e-10
Adult body size	rs2247401	15	53156672	G	A	0.733175	-0.00852417	0.001561	4.7e-08
Adult body size	rs28465175	15	53427155	A	G	0.93018	0.0150381	0.00270111	2.6e-08
Adult body size	rs7175642	15	59450079	T	G	0.341586	0.00859149	0.00147129	5.2e-09
Adult body size	rs28408562	15	60917079	C	G	0.553002	-0.00784012	0.00137968	1.3e-08
Adult body size	rs1369159	15	66360842	C	T	0.420399	0.00787534	0.0013963	1.7e-08
Adult body size	rs111584879	15	66678173	T	C	0.761347	0.00878936	0.00161059	4.8e-08
Adult body size	rs2241420	15	68082816	G	A	0.774304	0.0184512	0.0016375	1.9e-29
Adult body size	rs11633022	15	73074890	C	A	0.384832	-0.0108928	0.0014426	4.3e-14
Adult body size	rs62004865	15	74207695	T	A	0.894058	-0.0135621	0.00224169	1.4e-09
Adult body size	rs11856579	15	78012688	G	A	0.732386	0.00917954	0.00155262	3.4e-09
Adult body size	rs57488047	15	79403002	T	C	0.5316	0.00986083	0.00138545	1.1e-12
Adult body size	rs34994596	15	80991447	T	C	0.702696	0.0111514	0.00150201	1.1e-13
Adult body size	rs7498044	15	92573639	G	A	0.782638	0.00995173	0.00168107	3.2e-09
Adult body size	rs8038574	15	95275890	T	C	0.346246	0.00907367	0.00145054	4e-10
Adult body size	rs56803094	15	99222509	A	G	0.773245	0.00957693	0.00164509	5.8e-09
Adult body size	rs2715423	15	99511873	G	A	0.716196	0.0087436	0.0015222	9.2e-09
Adult body size	rs412243	16	339672	T	C	0.621245	0.0104789	0.00141618	1.4e-13
Adult body size	rs2516726	16	2095065	T	C	0.772109	0.00990951	0.00164497	1.7e-09
Adult body size	rs181179291	16	2787062	A	C	0.989001	-0.0403349	0.00669415	1.7e-09
Adult body size	rs879620	16	4015729	C	T	0.386749	-0.0142563	0.00141252	5.9e-24
Adult body size	rs2075637	16	4938280	T	C	0.438019	0.00837156	0.00138143	1.4e-09
Adult body size	rs11642387	16	6753239	A	G	0.899139	0.0128653	0.00229443	2.1e-08
Adult body size	rs199623362	16	9407038	C	T	0.457528	-0.00838908	0.0014571	8.5e-09
Adult body size	rs12927792	16	9713194	C	T	0.573589	-0.00867045	0.00139549	5.2e-10
Adult body size	rs8054082	16	19975418	C	T	0.859126	0.0174136	0.00199799	2.9e-18
Adult body size	rs11643772	16	20402499	T	G	0.527779	0.0100329	0.00138142	3.8e-13
Adult body size	rs7195386	16	24578458	T	C	0.491979	0.0076235	0.00137415	2.9e-08
Adult body size	rs13329943	16	24733751	C	T	0.268201	-0.0113063	0.00155186	3.2e-13
Adult body size	rs7498665	16	28883241	A	G	0.600456	-0.0172834	0.00140127	5.9e-35
Adult body size	rs3814883	16	29994922	C	T	0.517555	-0.014757	0.00137637	8.1e-27
Adult body size	rs34898535	16	31025641	C	T	0.622254	0.0143098	0.00141495	4.8e-24
Adult body size	rs8045063	16	49064424	G	A	0.810292	-0.00997947	0.00176025	1.4e-08
Adult body size	rs56094641	16	53806453	A	G	0.595371	-0.0465215	0.00139707	4e-243
Adult body size	rs10694251	16	69720803	G	GTAAA	0.41025	-0.0144967	0.00140044	4.1e-25
Adult body size	rs12149660	16	70309237	G	A	0.88505	0.0162176	0.00216124	6.2e-14
Adult body size	rs811054	16	72251132	C	T	0.462891	-0.00863679	0.00138424	4.4e-10
Adult body size	rs4500770	16	74658430	A	T	0.637193	0.00782096	0.00142756	4.3e-08
Adult body size	rs9673839	16	76895693	A	G	0.508934	-0.00830314	0.00137898	1.7e-09
Adult body size	rs12926506	16	81722413	C	T	0.830398	0.011097	0.0018398	1.6e-09
Adult body size	rs11150461	16	82448195	C	G	0.272697	0.00961866	0.0015461	4.9e-10
Adult body size	rs7206608	16	82872628	C	G	0.678317	-0.00978895	0.00146872	2.6e-11
Adult body size	rs4790292	17	1824305	C	A	0.846299	0.0163291	0.00191052	1.3e-17
Adult body size	rs58351927	17	5297038	A	G	0.697835	-0.0101443	0.0014973	1.2e-11
Adult body size	rs10684399	17	15945474	C	CAAAG	0.441482	-0.00816893	0.00138761	3.9e-09
Adult body size	rs55678940	17	21251092	C	CTGTAAAGAAA	0.500634	0.01367	0.00144617	3.3e-21
Adult body size	rs1017529	17	27912415	C	A	0.825162	-0.0106224	0.00183966	7.7e-09
Adult body size	rs73982435	17	31473455	C	T	0.784163	0.00942922	0.00166802	1.6e-08
Adult body size	rs12951079	17	34933059	G	A	0.581219	0.0107877	0.00140507	1.6e-14
Adult body size	rs113962925	17	46044446	C	T	0.925586	-0.0171085	0.00263645	8.6e-11
Adult body size	rs11079849	17	47090785	C	T	0.671402	0.0122339	0.00146379	6.4e-17
Adult body size	rs34542489	17	51917844	A	C	0.590246	0.00777978	0.00140115	2.8e-08
Adult body size	rs74929176	17	54905494	C	T	0.773047	0.00904667	0.00165261	4.4e-08
Adult body size	rs78369934	17	61739101	T	C	0.945453	0.0199362	0.00304655	6e-11
Adult body size	rs55931203	17	65854602	C	T	0.812733	-0.0125644	0.00177792	1.6e-12
Adult body size	rs535487752	17	73848542	T	A	0.83516	-0.0104574	0.00191212	4.5e-08
Adult body size	rs11150745	17	78757626	A	G	0.68227	0.0137948	0.00147616	9.2e-21
Adult body size	rs9319615	17	79072594	A	C	0.446918	0.0078364	0.00138103	1.4e-08
Adult body size	rs4969472	17	79976425	G	A	0.442996	0.00766132	0.00139124	3.7e-08
Adult body size	rs2083323	18	1856272	G	A	0.822294	-0.0104121	0.00179988	7.3e-09
Adult body size	rs5822974	18	7548483	T	TA	0.809913	0.0107409	0.0017607	1.1e-09
Adult body size	rs1788808	18	21090023	A	G	0.505066	0.0127402	0.00137473	1.9e-20
Adult body size	rs16940823	18	22137319	C	A	0.815366	0.010772	0.00178542	1.6e-09
Adult body size	rs6507054	18	31248323	T	C	0.415805	-0.00928368	0.00139315	2.7e-11
Adult body size	rs559231	18	39644247	G	T	0.60699	-0.00952495	0.00141154	1.5e-11
Adult body size	rs1834144	18	40744790	C	A	0.626766	0.00792997	0.00142258	2.5e-08
Adult body size	rs7230240	18	42597978	C	T	0.705419	0.00939729	0.00150477	4.2e-10
Adult body size	rs10438964	18	42950629	C	T	0.72636	0.00897888	0.00154729	6.5e-09
Adult body size	rs5824977	18	50441033	T	TAGA	0.137035	-0.0113307	0.00200143	1.5e-08
Adult body size	rs58243949	18	52509833	C	T	0.767269	-0.0120706	0.00162981	1.3e-13
Adult body size	rs784257	18	53397199	T	C	0.187518	-0.0105291	0.00176746	2.6e-09
Adult body size	rs200519957	18	56878075	A	AG	0.834012	0.0126217	0.00184971	8.9e-12
Adult body size	rs58084604	18	57849429	C	T	0.766902	-0.0351865	0.00162237	2.6e-104
Adult body size	rs113728099	18	58157767	G	A	0.975264	0.0398989	0.00445038	3.1e-19
Adult body size	rs12454712	18	60845884	T	C	0.623174	-0.00811303	0.00141626	1e-08
Adult body size	rs1373349	18	63282992	C	T	0.316129	0.00980624	0.00148041	3.5e-11
Adult body size	rs8089514	18	69224478	T	A	0.631443	-0.0081679	0.00143938	1.4e-08
Adult body size	rs4806814	19	1860147	G	A	0.84213	0.0126512	0.00190443	3.1e-11
Adult body size	rs878439	19	1943973	A	G	0.441185	-0.00763176	0.00138975	4e-08
Adult body size	rs45521740	19	2245622	G	A	0.942508	-0.0180325	0.00295173	1e-09
Adult body size	rs72976986	19	4050424	G	A	0.80983	0.0138512	0.00176589	4.4e-15
Adult body size	rs75957461	19	11166163	C	T	0.945909	-0.0176806	0.00304742	6.6e-09
Adult body size	rs6511826	19	12706991	G	A	0.0868843	0.013982	0.00245639	1.3e-08
Adult body size	rs12974954	19	18237676	C	T	0.462289	0.00853606	0.00137851	5.9e-10
Adult body size	rs12104325	19	18490284	G	A	0.573818	0.00902261	0.00140214	1.2e-10
Adult body size	rs10404726	19	18834514	C	T	0.534535	0.0122931	0.00137833	4.7e-19
Adult body size	rs112253053	19	19425145	T	A	0.839148	0.013771	0.00186963	1.8e-13
Adult body size	rs71169767	19	29156123	C	CA	0.545509	0.00763946	0.00138674	3.6e-08
Adult body size	rs12462975	19	30272202	G	A	0.67034	-0.0114755	0.00146997	5.9e-15
Adult body size	rs73026723	19	31017177	C	T	0.845759	0.0140677	0.00190031	1.3e-13
Adult body size	rs7255223	19	32824310	C	A	0.735259	0.00896737	0.00155716	8.5e-09
Adult body size	rs60497719	19	33971746	G	A	0.70965	-0.00966895	0.00158251	1e-09
Adult body size	rs29938	19	34311481	T	C	0.341254	-0.00864016	0.00145127	2.6e-09
Adult body size	rs429358	19	45411941	T	C	0.845733	0.0160691	0.00190178	2.9e-17
Adult body size	rs10423928	19	46182304	T	A	0.805697	0.0207638	0.00173237	4.2e-33
Adult body size	rs3810291	19	47569003	G	A	0.324953	-0.0157949	0.00146479	4.1e-27
Adult body size	rs4545921	19	49646006	A	G	0.399961	0.00769113	0.00140446	4.3e-08
Adult body size	rs200876443	19	50363585	CAG	C	0.96462	-0.0248791	0.00371141	2e-11
Adult body size	rs61746970	19	51132746	G	A	0.960851	-0.0213186	0.00361813	3.8e-09
Adult body size	rs148108087	19	51781455	G	A	0.945667	0.0185273	0.00318132	5.8e-09
Adult body size	rs6075658	20	2094078	T	C	0.530781	0.00848906	0.00137576	6.8e-10
Adult body size	rs2206925	20	6634895	T	C	0.364264	-0.0117606	0.00143024	2e-16
Adult body size	rs4813224	20	16546846	T	C	0.262182	-0.00912165	0.0015635	5.4e-09
Adult body size	rs8124896	20	21385659	T	C	0.899001	-0.0131677	0.00228357	8.1e-09
Adult body size	rs6050446	20	25195509	A	G	0.0325877	-0.0264171	0.00389465	1.2e-11
Adult body size	rs201475383	20	26273991	G	A	0.9663	0.0240169	0.00391789	8.8e-10
Adult body size	rs187067151	20	29539588	G	T	0.965963	0.0266801	0.00397873	2e-11
Adult body size	rs1987960	20	30649834	T	C	0.0475408	-0.0189251	0.00331178	1.1e-08
Adult body size	rs4911382	20	32553095	C	T	0.414559	-0.00831839	0.00139678	2.6e-09
Adult body size	rs6029180	20	39178923	A	G	0.673959	-0.00818774	0.00147876	3.1e-08
Adult body size	rs6030803	20	41986507	T	C	0.873489	0.0129265	0.00207355	4.5e-10
Adult body size	rs2425856	20	44911954	A	G	0.444163	0.00842158	0.00138117	1.1e-09
Adult body size	rs112852122	20	47498117	G	A	0.84206	0.0133703	0.00191182	2.7e-12
Adult body size	rs66460909	20	51195387	G	A	0.8077	0.0156925	0.00174901	2.9e-19
Adult body size	rs11472251	20	54158730	G	GTCTC	0.656825	-0.00841292	0.00145622	7.6e-09
Adult body size	rs6069625	20	54747469	A	G	0.726597	0.00872998	0.00155672	2e-08
Adult body size	rs7264802	20	62692440	A	G	0.251739	-0.00980735	0.00159143	7.2e-10
Adult body size	rs11701433	21	40296411	C	T	0.330577	-0.00908795	0.00146502	5.5e-10
Adult body size	rs2836935	21	40566372	T	G	0.838715	-0.0106413	0.0018658	1.2e-08
Adult body size	rs2837398	21	41427168	A	C	0.595776	-0.00819988	0.00140095	4.8e-09
Adult body size	rs1964926	21	42653121	A	G	0.354052	-0.00823118	0.00143981	1.1e-08
Adult body size	rs915814	21	46493003	G	A	0.762024	0.00982583	0.00161419	1.1e-09
Adult body size	rs403694	21	46567625	C	T	0.462687	-0.0121794	0.00138306	1.3e-18
Adult body size	rs1296685	22	18230964	A	G	0.788849	-0.00949275	0.00169731	2.2e-08
Adult body size	rs1633418	22	20091756	T	C	0.391187	0.00792126	0.00141049	2e-08
Adult body size	rs543124501	22	40677499	A	AT	0.677019	0.0132265	0.00148745	6e-19
Adult body size	rs738140	22	41884954	A	G	0.689843	0.00885996	0.00148784	2.6e-09
Adult body size	rs9615723	22	48386670	C	T	0.440516	0.00771492	0.00140281	3.8e-08
Adult body size	rs34778589	22	50709957	A	C	0.916868	-0.0143368	0.0025	9.8e-09

## Sheet: S3 Univariable
Supplementary Table 3: Univariable Mendelian randomization results
Method - Mendelian randomization method, nSNPs - number of genetic variants used as instrumental variables, OR - odds ratio, LCI - lower confidence interval, UCI - upper confidence interval, P - corresponding p-value
Exposure	Outcome	Method	nSNPs	OR	LCI	UCI	P
Childhood body size	Bowel cancer	Inverse variance weighted	313	1.02081	0.945094	1.10259	0.600406
Childhood body size	Bowel cancer	MR Egger	313	1.12423	0.94566	1.33652	0.184545
Childhood body size	Bowel cancer	Weighted median	313	1.11749	0.980587	1.2735	0.0957153
Adult body size	Bowel cancer	Inverse variance weighted	580	1.03578	0.972818	1.10282	0.27188
Adult body size	Bowel cancer	MR Egger	580	1.0859	0.906566	1.30072	0.370857
Adult body size	Bowel cancer	Weighted median	580	1.07465	0.961972	1.20053	0.202679
Childhood body size	Breast cancer	Inverse variance weighted	313	0.875232	0.804756	0.95188	0.00186207
Childhood body size	Breast cancer	MR Egger	313	0.812637	0.67294	0.981334	0.0311003
Childhood body size	Breast cancer	Weighted median	313	0.797513	0.692868	0.917962	0.00161724
Adult body size	Breast cancer	Inverse variance weighted	580	0.950337	0.88742	1.01772	0.144971
Adult body size	Breast cancer	MR Egger	580	0.881792	0.724058	1.07389	0.210909
Adult body size	Breast cancer	Weighted median	580	0.914735	0.820859	1.01935	0.106708
Childhood body size	Diabetes	Inverse variance weighted	313	1.42834	1.30515	1.56316	9.39222e-15
Childhood body size	Diabetes	MR Egger	313	1.73798	1.42087	2.12585	7.54484e-08
Childhood body size	Diabetes	Weighted median	313	1.55041	1.37745	1.74508	3.69619e-13
Adult body size	Diabetes	Inverse variance weighted	580	1.86831	1.7099	2.04139	1.74318e-43
Adult body size	Diabetes	MR Egger	580	2.28603	1.77245	2.94842	1.90536e-10
Adult body size	Diabetes	Weighted median	580	1.94537	1.78371	2.12168	4.40063e-51
Childhood body size	Heart disease	Inverse variance weighted	313	1.14656	1.07136	1.22703	7.76541e-05
Childhood body size	Heart disease	MR Egger	313	1.18023	1.01322	1.37477	0.0332748
Childhood body size	Heart disease	Weighted median	313	1.15858	1.05319	1.27452	0.00248582
Adult body size	Heart disease	Inverse variance weighted	580	1.29984	1.22463	1.37966	6.45374e-18
Adult body size	Heart disease	MR Egger	580	1.27182	1.07131	1.50985	0.00601521
Adult body size	Heart disease	Weighted median	580	1.31804	1.2067	1.43966	8.65246e-10
Childhood body size	High blood pressure	Inverse variance weighted	313	1.17797	1.09098	1.27191	2.85928e-05
Childhood body size	High blood pressure	MR Egger	313	1.21796	1.02493	1.44735	0.0251097
Childhood body size	High blood pressure	Weighted median	313	1.22556	1.10695	1.35688	8.98057e-05
Adult body size	High blood pressure	Inverse variance weighted	580	1.31056	1.23131	1.3949	1.91761e-17
Adult body size	High blood pressure	MR Egger	580	1.55966	1.30414	1.86524	1.12211e-06
Adult body size	High blood pressure	Weighted median	580	1.46758	1.35073	1.59454	1.27543e-19
Childhood body size	Lung cancer	Inverse variance weighted	313	1.12001	1.01474	1.2362	0.0244182
Childhood body size	Lung cancer	MR Egger	313	1.12852	0.90379	1.40912	0.285906
Childhood body size	Lung cancer	Weighted median	313	1.07507	0.951194	1.21508	0.246492
Adult body size	Lung cancer	Inverse variance weighted	580	1.33748	1.24185	1.44047	1.55599e-14
Adult body size	Lung cancer	MR Egger	580	1.11624	0.902106	1.38119	0.311573
Adult body size	Lung cancer	Weighted median	580	1.29599	1.17904	1.42453	7.73013e-08
Childhood body size	Prostate cancer	Inverse variance weighted	313	0.908855	0.829237	0.996117	0.0410359
Childhood body size	Prostate cancer	MR Egger	313	0.722904	0.589343	0.886732	0.00184902
Childhood body size	Prostate cancer	Weighted median	313	0.798633	0.690872	0.923203	0.00236181
Adult body size	Prostate cancer	Inverse variance weighted	580	0.831306	0.771286	0.895997	1.34991e-06
Adult body size	Prostate cancer	MR Egger	580	0.707455	0.570438	0.877382	0.00162695
Adult body size	Prostate cancer	Weighted median	580	0.839046	0.741887	0.948929	0.00519213
Childhood body size	Stroke	Inverse variance weighted	313	0.990456	0.933472	1.05092	0.751098
Childhood body size	Stroke	MR Egger	313	1.027	0.898889	1.17337	0.695127
Childhood body size	Stroke	Weighted median	313	0.984059	0.897384	1.07911	0.732657
Adult body size	Stroke	Inverse variance weighted	580	0.965466	0.919531	1.0137	0.157641
Adult body size	Stroke	MR Egger	580	0.934512	0.812176	1.07528	0.344073
Adult body size	Stroke	Weighted median	580	0.965847	0.89789	1.03895	0.350536

## Sheet: S4 Multivariable
Supplementary Table 4: Multivariable Mendelian randomization results
OR - odds ratio, LCI - lower confidence interval, UCI - upper confidence interval, P - corresponding p-value
Exposure	Outcome	OR	LCI	UCI	P
Childhood body size	Bowel cancer	1.00109	0.904945	1.10744	0.983171
Adult body size	Bowel cancer	1.02631	0.940867	1.11951	0.558183
Childhood body size	Breast cancer	0.867593	0.775289	0.970886	0.0133304
Adult body size	Breast cancer	1.03327	0.9379	1.13833	0.50772
Childhood body size	Diabetes	0.901441	0.785424	1.03459	0.139899
Adult body size	Diabetes	1.96648	1.74654	2.21411	5.39231e-29
Childhood body size	Heart disease	0.975007	0.886626	1.0722	0.601607
Adult body size	Heart disease	1.31246	1.20937	1.42434	7.27938e-11
Childhood body size	High blood pressure	1.00061	0.904093	1.10743	0.990603
Adult body size	High blood pressure	1.29767	1.18916	1.41608	4.95601e-09
Childhood body size	Lung cancer	0.923533	0.817516	1.0433	0.201015
Adult body size	Lung cancer	1.40875	1.26836	1.56467	1.56703e-10
Childhood body size	Prostate cancer	1.02185	0.902848	1.15654	0.732226
Adult body size	Prostate cancer	0.817556	0.734893	0.909517	0.000212312
Childhood body size	Stroke	1.00654	0.92841	1.09124	0.874391
Adult body size	Stroke	0.962225	0.89757	1.03154	0.277902

## Sheet: S5 MVMR Smoking
Supplementary Table 5: Univariable and Multivariable Mendelian randomization results for lifetime smoking and lung cancer
OR - odds ratio, LCI - lower confidence interval, UCI - upper confidence interval, P - corresponding p-value
		Univariable MR				Multivariable MR
Exposure	Outcome	OR	LCI	UCI	P	OR	LCI	UCI	P
Childhood body size	Lung cancer	1.12001	1.01474	1.2362	0.0244182	0.975838	0.862648	1.10388	0.697402
Adult body size	Lung cancer	1.33748	1.24185	1.44047	1.55599e-14	1.10915	0.988062	1.24507	0.0790238
Lifetime smoking	Lung cancer	3.08493	2.62133	3.63052	7.04315e-42	2.84759	2.41923	3.35181	2.67418e-36
